# Supplementary material for: Nature of photoexcited states in ZnO-embedded graphene quantum dots
Source: Royal Society of Chemistry journal article supplement (doi:10.1039/d2cp04484f), 2023-01-01
Supplement: d2cp04484f1.pdf [file d2cp04484f1.pdf]

## Electronic Supplementary Information

### Nature of photoexcited states in ZnO-embedded graphene quantum dots

Ivan Shtepliuk<sup>a,b</sup> and Rositsa Yakimova<sup>a</sup>

<sup>a</sup>*Semiconductor Materials Division, Department of Physics, Chemistry and Biology-IFM, Linköping University, S-58183 Linköping, Sweden*

<sup>b</sup>*I.M. Frantsevich Institute for Problems of Materials Science, N.A.S. of Ukraine, 3, Krzhizhanovsky Str., UA-03142 Kyiv, Ukraine*

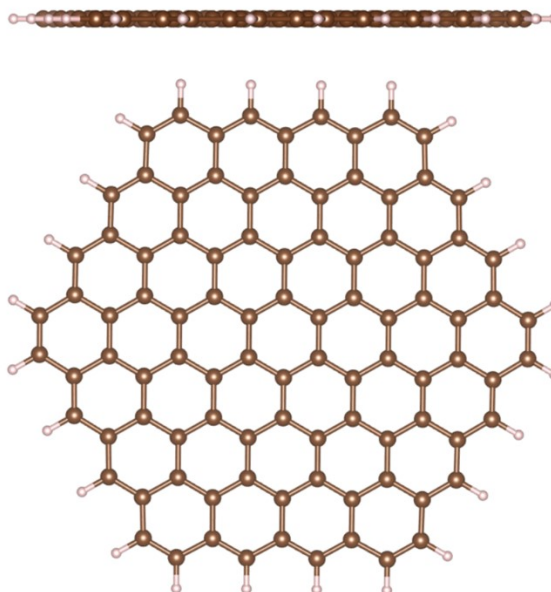

**Figure S1.** (Side and top views) Optimized structure of  $C_{96}H_{24}$  molecule by using PBE0 functional. Brown and whitish balls correspond to carbon and hydrogen atoms, respectively.

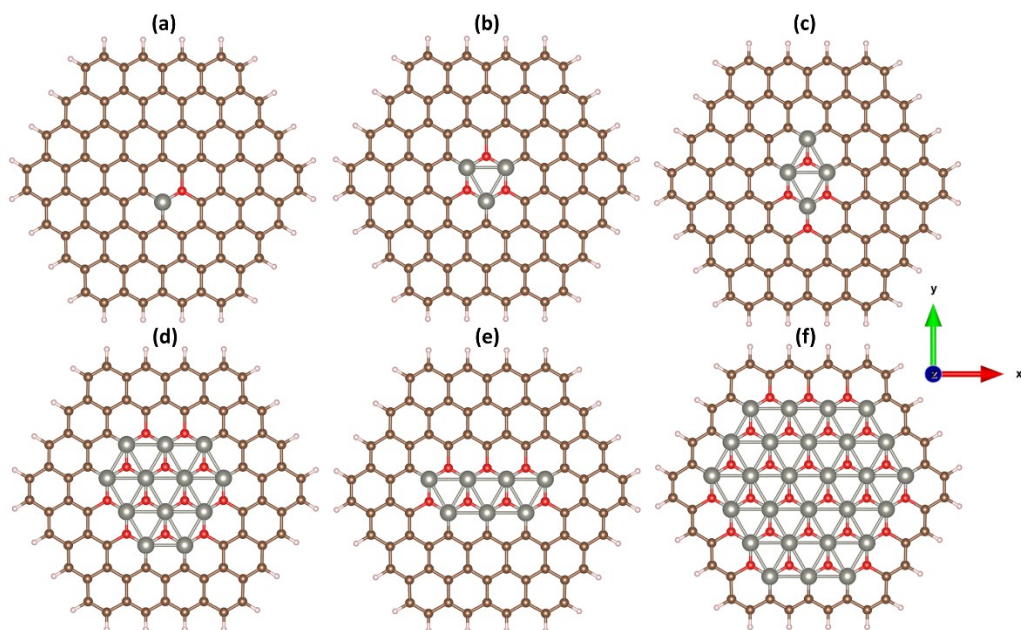

**Figure S2.** (Top views) Non-relaxed structures of the  $(\text{ZnO})_n\text{C}_{96-2n}$ : (a)  $n=1$ , (b)  $n=3$ , (c)  $n=4$ , (d)  $n=7$ , (e)  $n=12$  and (f)  $n=27$ , respectively. Brown, whitish, blue, and red balls correspond to carbon, hydrogen, zinc, and oxygen atoms, respectively.

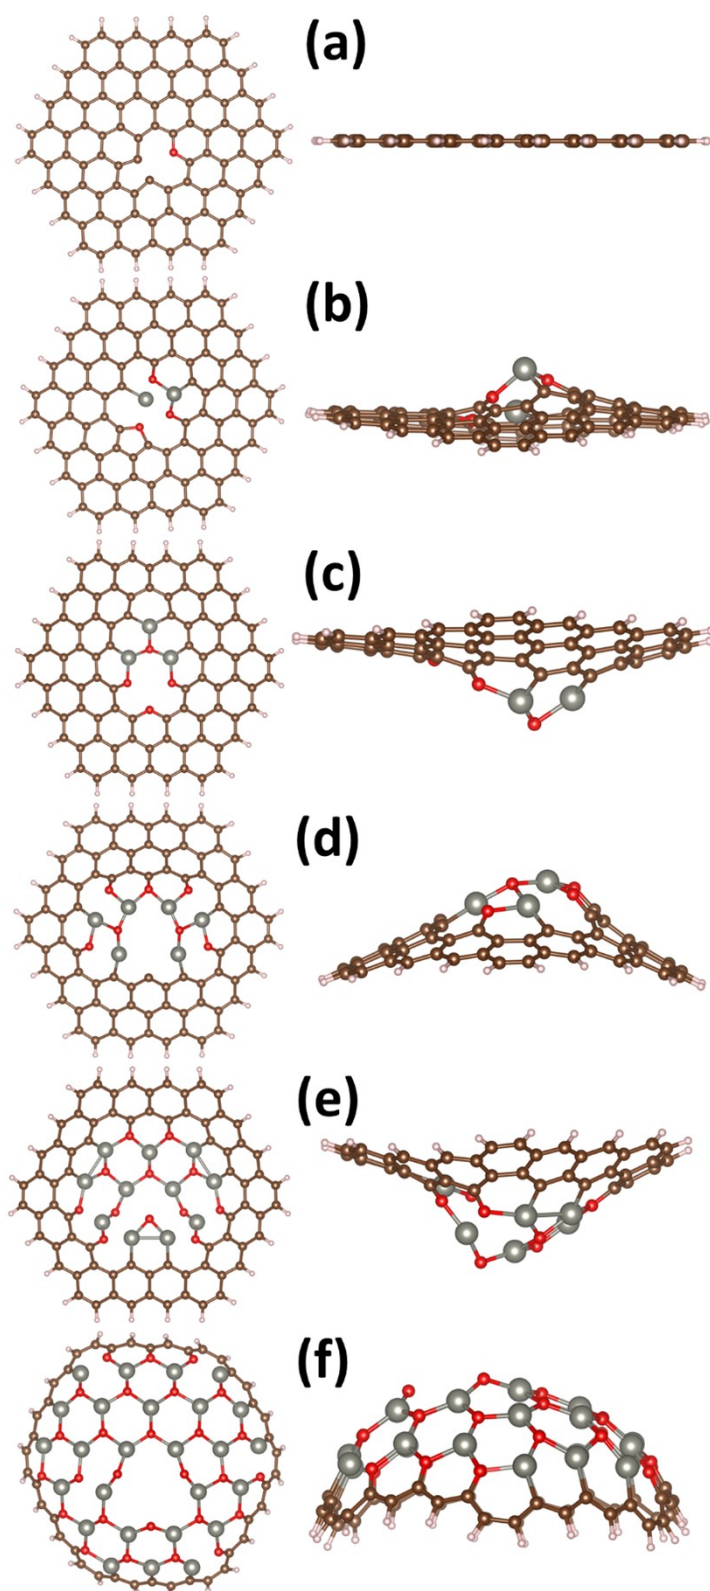

**Figure S3.** (Top and side views) Optimized structures of  $(\text{ZnO})_n\text{C}_{96-2n}$  after removal of Zn atom: (a)  $n=1$ , (b)  $n=3$ , (c)  $n=4$ , (d)  $n=7$ , (e)  $n=12$  and (f)  $n=27$ , respectively. Brown, whitish, blue, and red balls correspond to carbon, hydrogen, zinc, and oxygen atoms, respectively. All calculations are performed using PBE0 functional.

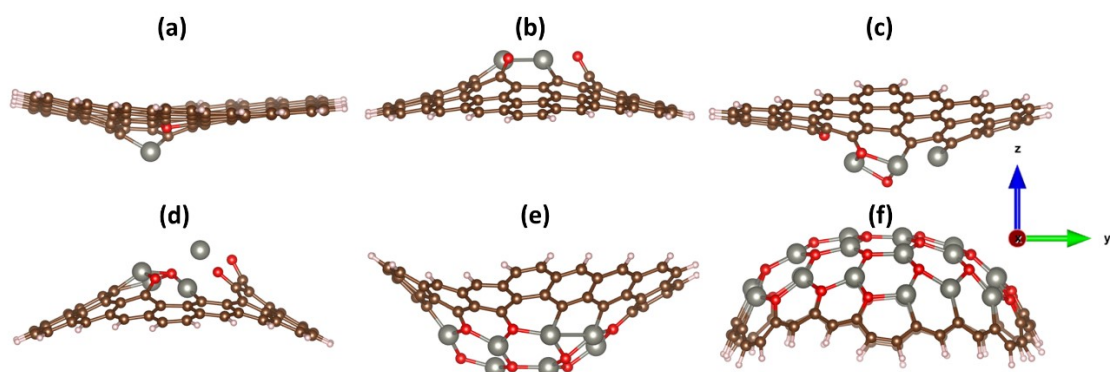

**Figure S4.** (Side view) Optimized structures of the  $(\text{ZnO})_n\text{C}_{96-2n}$ : (a)  $n=1$ , (b)  $n=3$ , (c)  $n=4$ , (d)  $n=7$ , (e)  $n=12$  and (f)  $n=27$ , respectively. Brown, whitish, blue, and red balls correspond to carbon, hydrogen, zinc, and oxygen atoms, respectively. All calculations are performed using PBE0 functional.

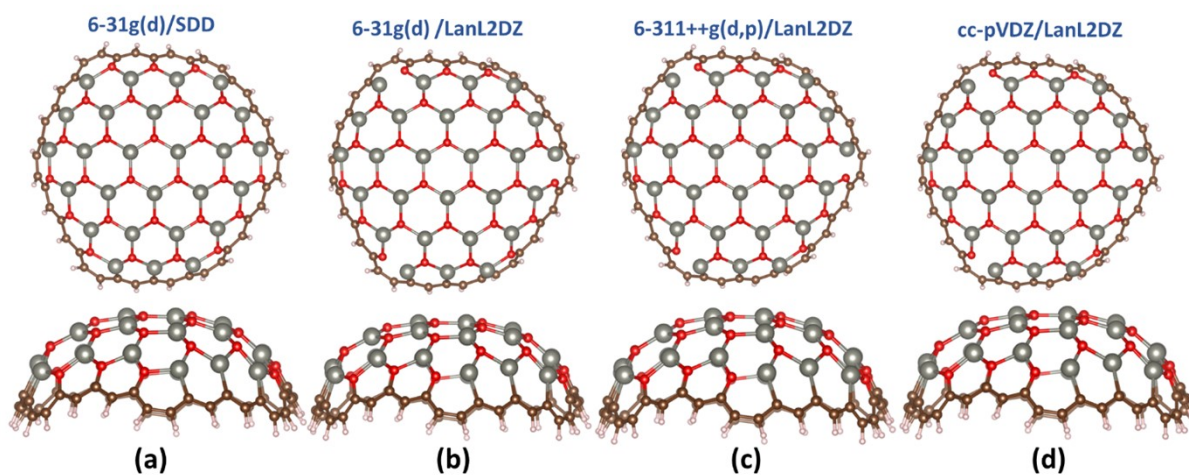

**Figure S5.** (Top and side views) Optimized structures of the  $(\text{ZnO})_{27}\text{C}_{42}$  predicted by PBE0 functional using different combination of basis sets: (a) 6-31g(d)/SDD, (b) 6-31g(d)/LanL2DZ, (c) 6-311++g(d, p)/LanL2DZ and (d) cc-PVDZ/LanL2DZ, respectively.

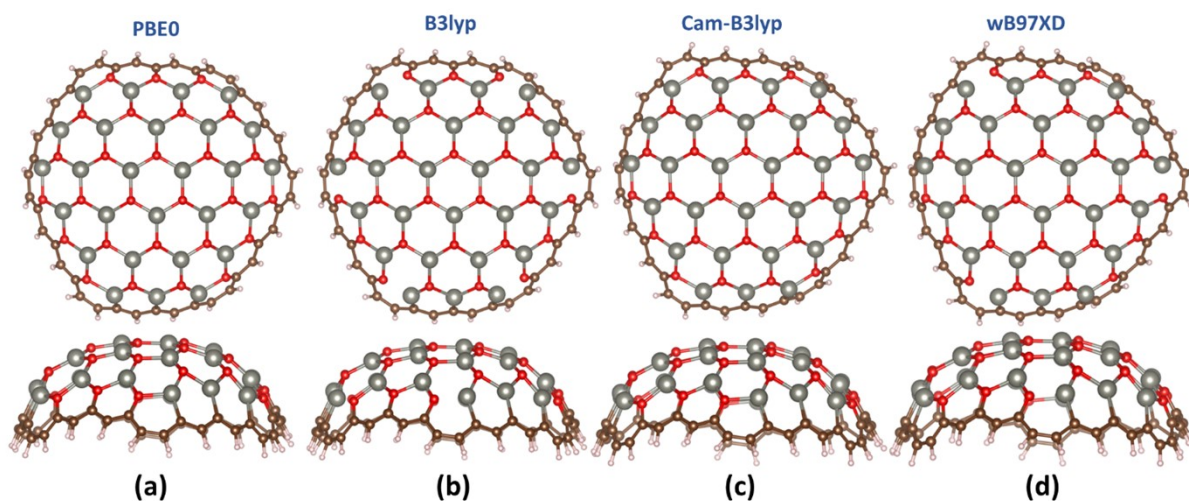

**Figure S6.** (Top and side views) Optimized structures of the  $(\text{ZnO})_{27}\text{C}_{42}$  predicted using different functionals: (a) PBE0, (b) B3LYP, (c) CAM-B3LYP and (d) wB97XD, respectively.

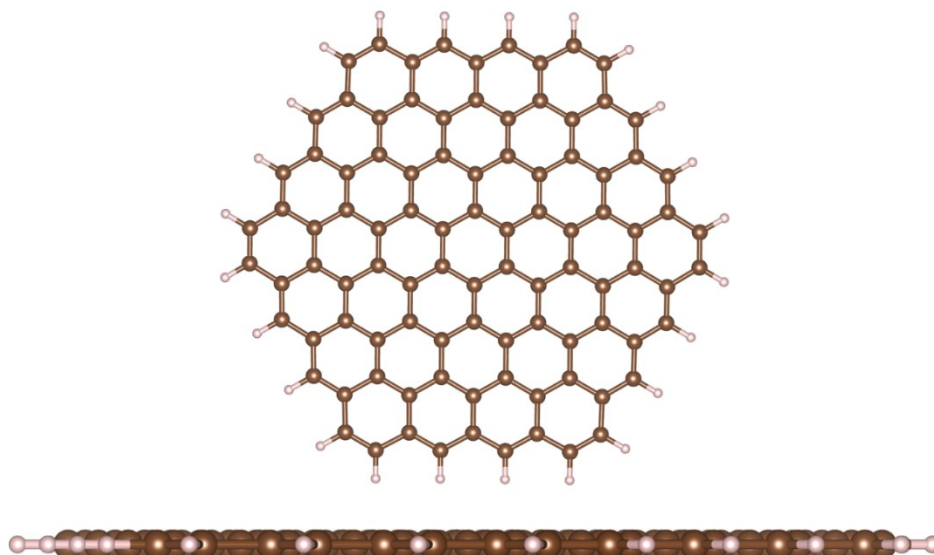

**Figure S7.** (Top and side views) Optimized structure of  $C_{96}H_{24}$  molecule by using CAM-B3LYP functional. Brown and whitish balls correspond to carbon and hydrogen atoms, respectively.

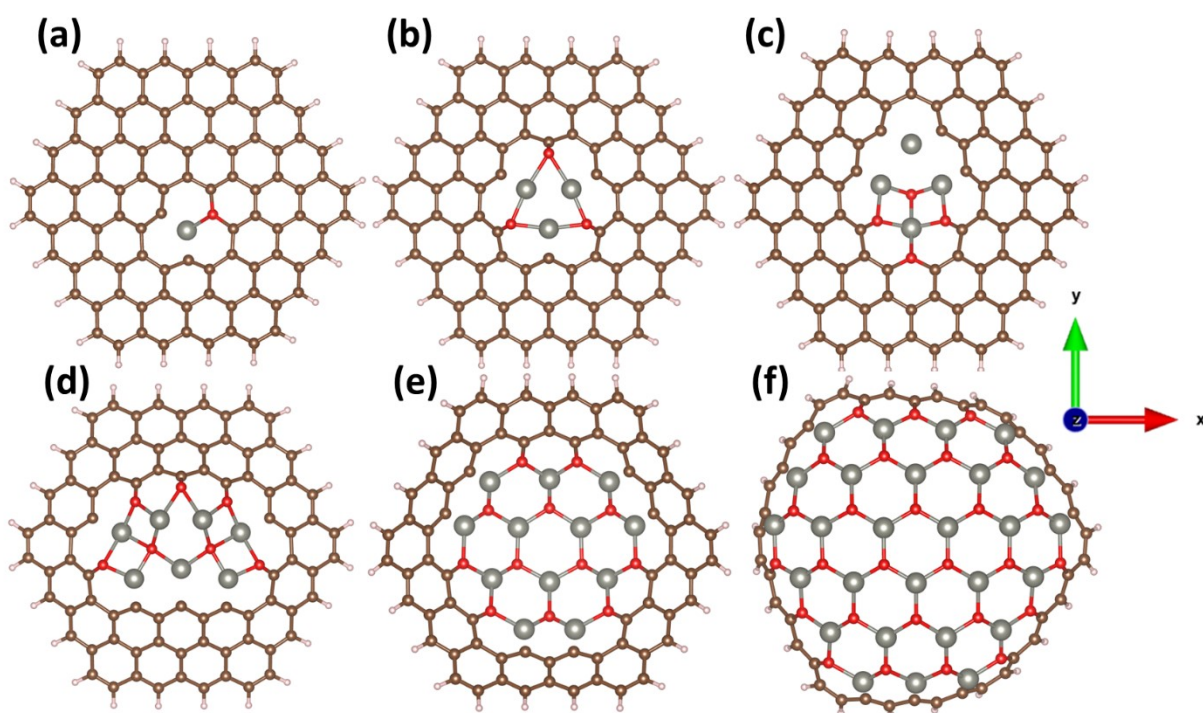

**Figure S8.** (Top views) Optimized structures of the  $(ZnO)_n C_{96-2n}$ : (a)  $n=1$ , (b)  $n=3$ , (c)  $n=4$ , (d)  $n=7$ , (e)  $n=12$  and (f)  $n=27$ , respectively. Brown, whitish, blue, and red balls correspond to carbon, hydrogen, zinc, and oxygen atoms, respectively. All calculations are performed using CAM-B3LYP functional.

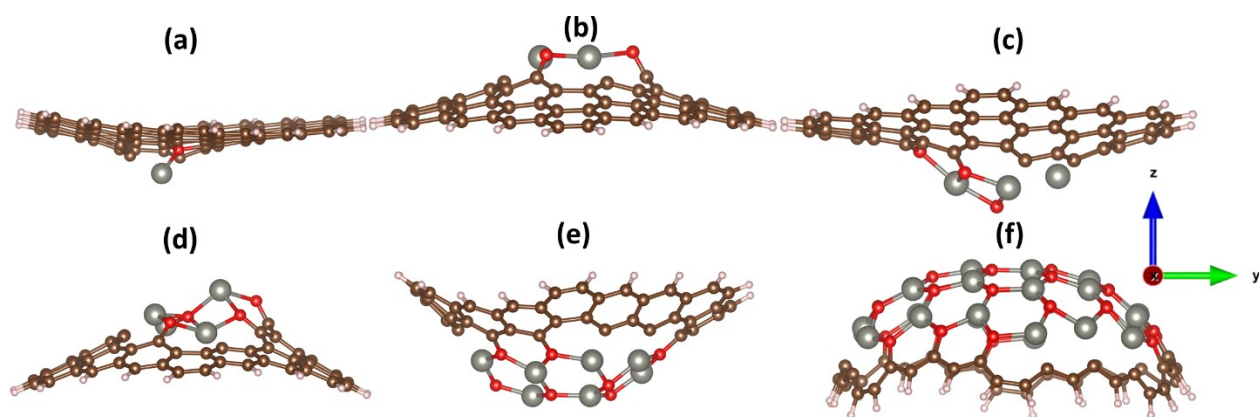

**Figure S9.** (Side views) Optimized structures of the  $(\text{ZnO})_n\text{C}_{96-2n}$ : (a)  $n=1$ , (b)  $n=3$ , (c)  $n=4$ , (d)  $n=7$ , (e)  $n=12$  and (f)  $n=27$ , respectively. Brown, whitish, blue, and red balls correspond to carbon, hydrogen, zinc, and oxygen atoms, respectively. All calculations are performed using CAM-B3LYP functional.

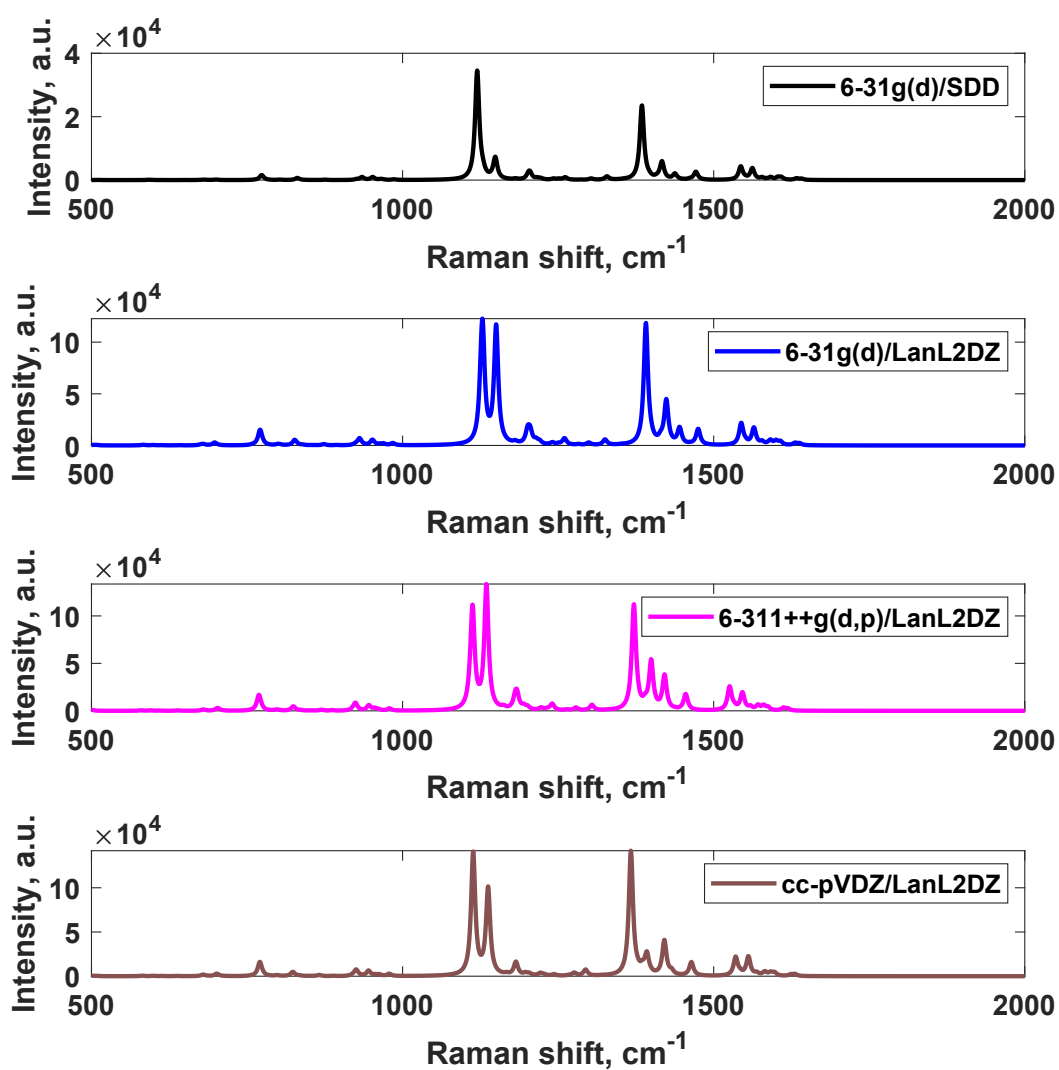

**Figure S10.** Raman spectra of the  $(\text{ZnO})_{27}\text{C}_{42}$  predicted by PBE0 functional using different combination of basis sets: 6-31g(d)/SDD, 6-31g(d)/LanL2DZ, 6-311++g(d, p)/LanL2DZ and cc-pVDZ/LanL2DZ, respectively.



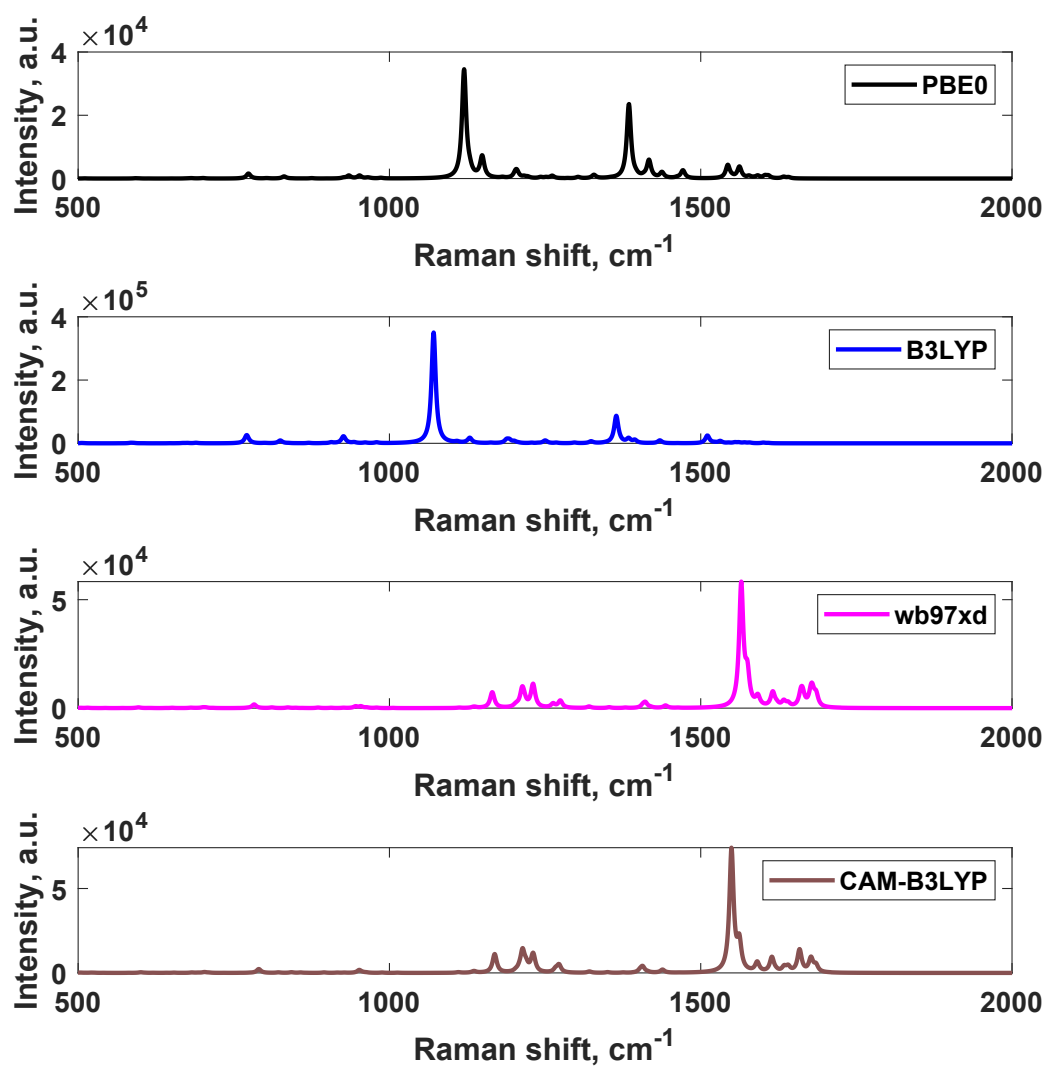

**Figure S11.** Raman spectra of the  $(\text{ZnO})_{27}\text{C}_{42}$  predicted using different functionals: PBE0, B3LYP, CAM-B3LYP, and wB97XD, respectively.

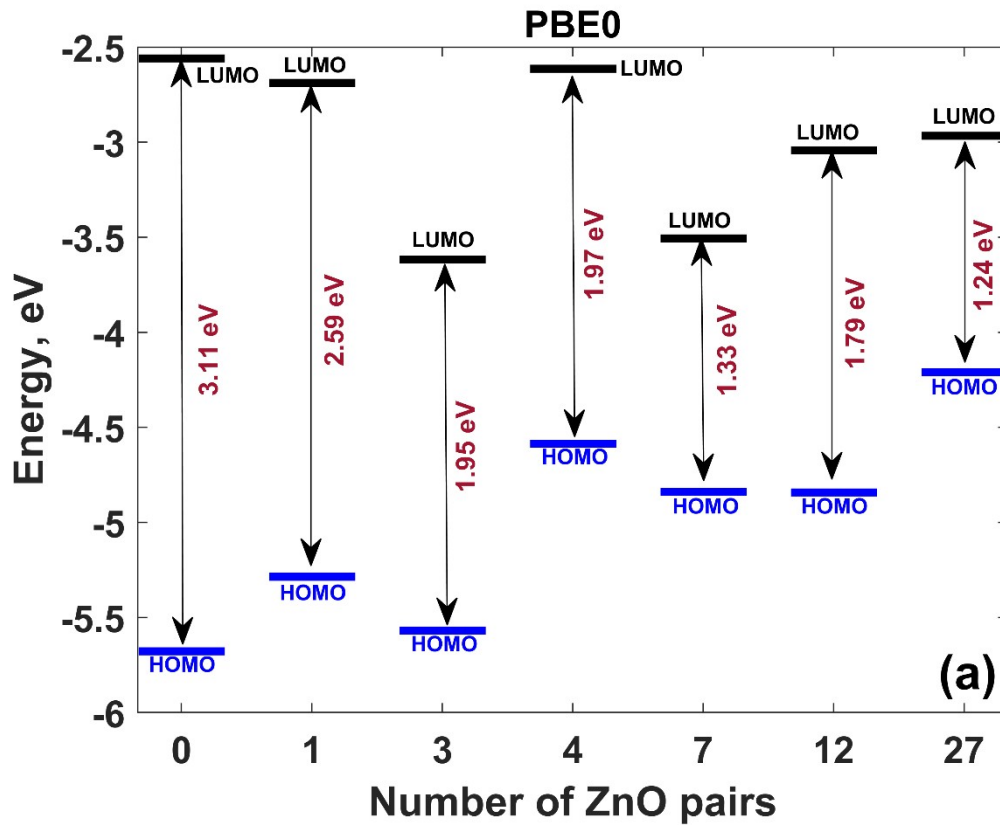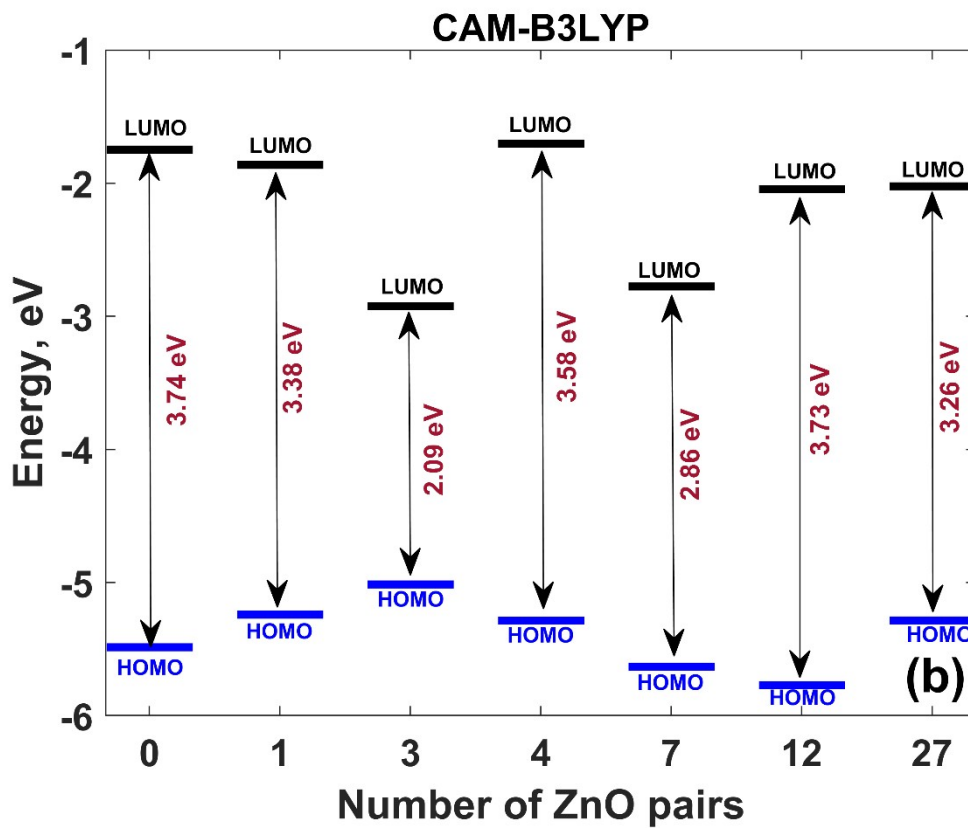

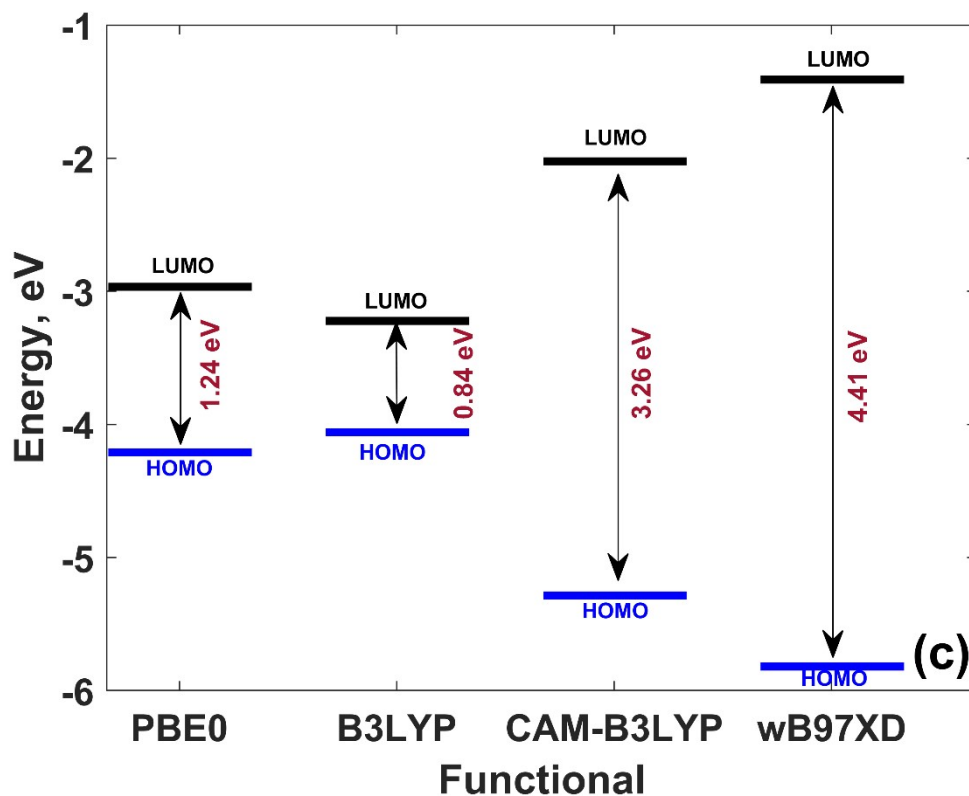

**Figure S12.** Molecular orbital diagram summarising all considered systems predicted by using different functionals: (a) PBE0 and (b) CAM-B3LYP. (c) A comparison of HOMO–LUMO gaps of  $(\text{ZnO})_{27}\text{C}_{42}$  system predicted by using different functionals. The arrows designate HOMO–LUMO gaps.

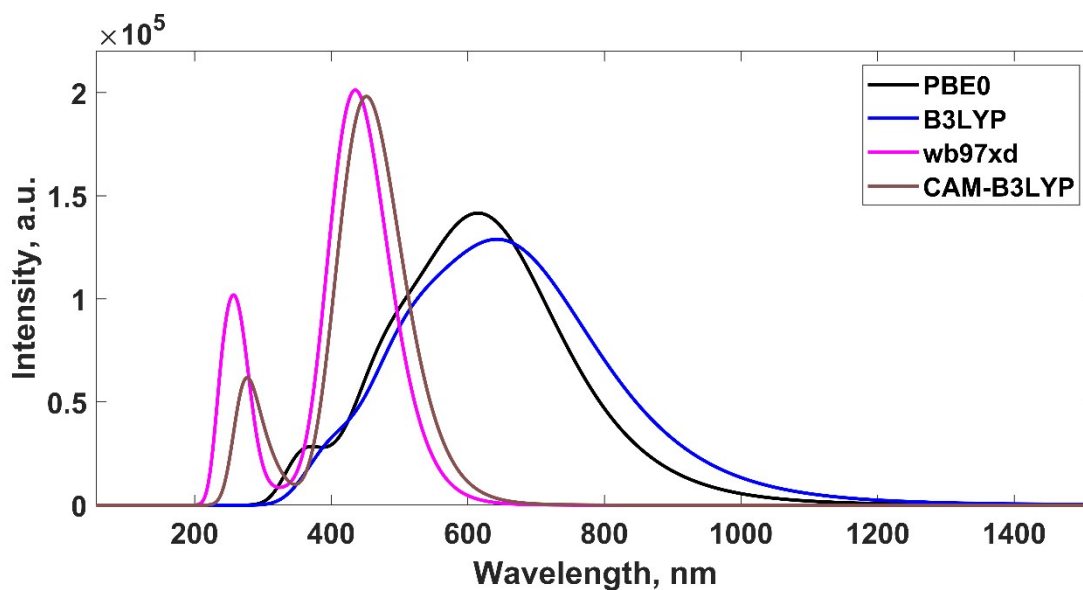

**Figure S13.** UV-vis absorption spectra of the  $(\text{ZnO})_{27}\text{C}_{42}$  system predicted by different functionals.

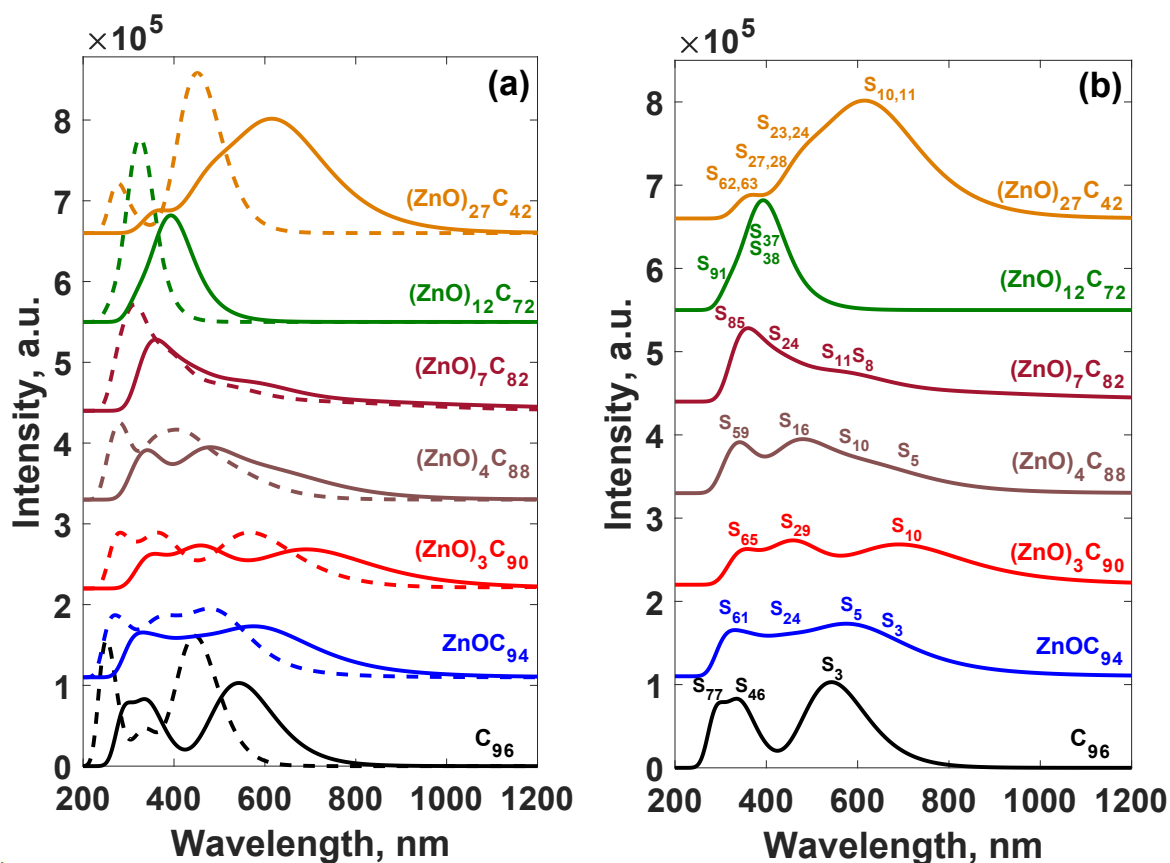

**Figure S14.** (a) A comparison of ultraviolet-visible (UV-vis) absorption spectra of the  $(\text{ZnO})_n\text{C}_{96-2n}$  structures predicted by using PBE0/6-31G\*/SDD and CAM-B3LYP/6-31G\*/SDD methods. (b) Assignment of absorption bands of  $(\text{ZnO})_n\text{C}_{96-2n}$  structures predicted by using PBE0/6-31G\*/SDD method.

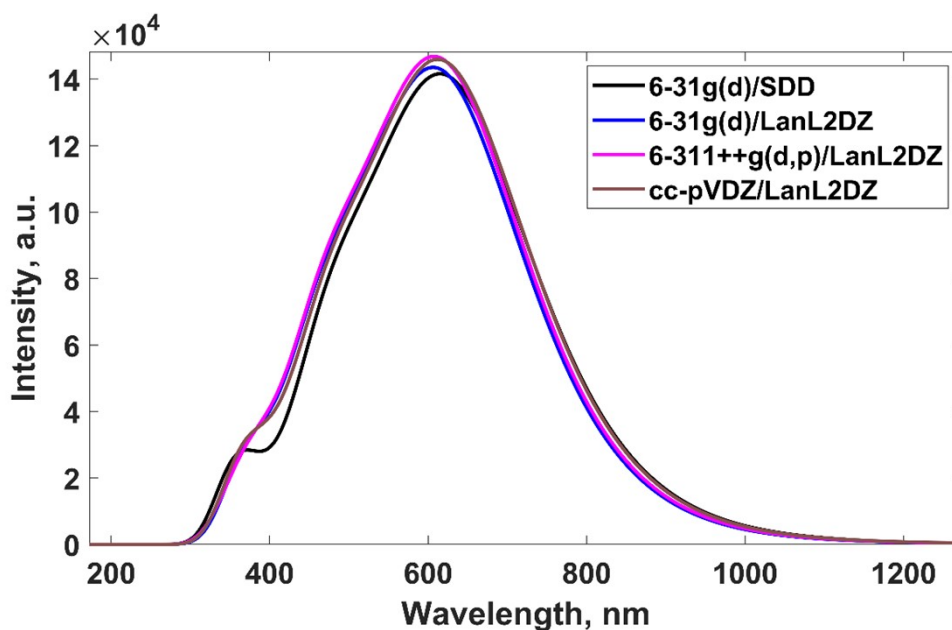

**Figure S15.** UV-vis absorption spectra of the  $(\text{ZnO})_{27}\text{C}_{42}$  system predicted by PBE0 functional using different combination of basis sets.

**Table S1.** Properties of  $S_1$  excited states in  $(\text{ZnO})_n\text{C}_{96-2n}$ : (a)  $n=1$ , (b)  $n=3$ , (c)  $n=4$ , (d)  $n=7$ , (e)  $n=12$  and (f)  $n=27$ , respectively. All calculations are performed using CAM-B3LYP functional.

| Excited state | Wavelength, nm | Oscillator strength, $f$ | $D$ , Å | $S_r$ | $t$ , Å | Type  | Major contribution                |
|---------------|----------------|--------------------------|---------|-------|---------|-------|-----------------------------------|
| 0             | 592.74         | 0                        | 0.000   | 0.96  | -1.195  | LE    | H-1->LUMO (47%), HOMO->L+1 (47%)  |
| 1             | 672.54         | 0.08                     | 0.666   | 0.92  | -3.507  | LE    | H-1->L+1 (17%), HOMO->LUMO (72%)  |
| 3             | 2295.57        | 0.03                     | 0.719   | 0.69  | -3.360  | LE    | HOMO->LUMO (95%)                  |
| 4             | 670.65         | 0                        | 0.900   | 0.87  | -3.521  | LE    | H-1->L+1 (31%), HOMO->LUMO (62%)  |
| 7             | 810.61         | 0.19                     | 2.561   | 0.61  | -1.273  | LE-CT | H-2->LUMO (18%), HOMO->LUMO (73%) |
| 12            | 532.92         | 0                        | 3.866   | 0.21  | 1.663   | CT    | H-1->LUMO (86%)                   |
| 27            | 613.44         | 0.002                    | 4.087   | 0.20  | 1.882   | CT    | HOMO->LUMO (80%)                  |

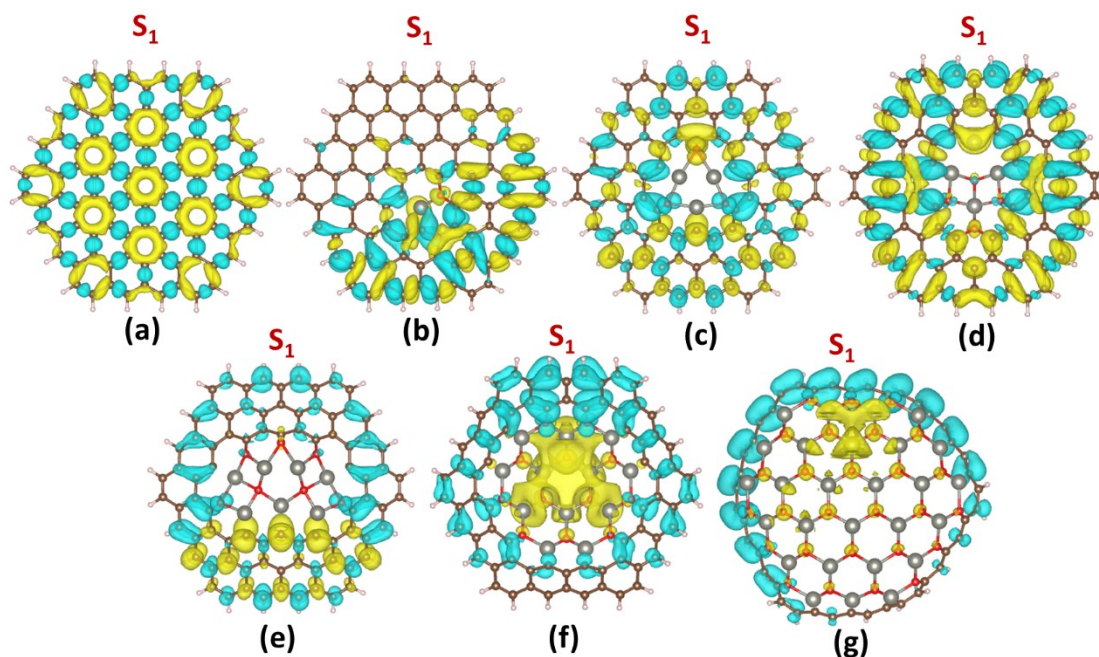

**Figure S16.** CDD for  $S_1$  excited states in  $(\text{ZnO})_n\text{C}_{96-2n}$ : (a)  $n=1$ , (b)  $n=3$ , (c)  $n=4$ , (d)  $n=7$ , (e)  $n=12$  and (f)  $n=27$ , respectively. Herein, yellow denotes positive charge distribution and cyan means negative charge distribution. Isosurface level is set to be 0.0003.

All calculations are performed using CAM-B3LYP functional.

**Table S2.** Properties of dominant excited states (with oscillator strength  $f > 0.1$ ) in C<sub>96</sub> system.

All calculations are performed using CAM-B3LYP functional.

| Excited state | Wavelength, nm | Oscillator strength, $f$ | $D$ , Å | $S_r$ | $t$ , Å | Type | Major contribution                                                 |
|---------------|----------------|--------------------------|---------|-------|---------|------|--------------------------------------------------------------------|
| S1            | 592.74         | 0                        | 0.000   | 0.96  | -1.195  | LE   | H-1->LUMO (47%), HOMO->L+1 (47%)                                   |
| S3            | 446.01         | 1.98                     | 0.000   | 0.96  | -1.900  | LE   | H-1->LUMO (23%), H-1->L+1 (25%), HOMO->LUMO (25%), HOMO->L+1 (23%) |
| S4            | 446.01         | 1.98                     | 0.000   | 0.96  | -1.098  | LE   | H-1->LUMO (25%), H-1->L+1 (23%), HOMO->LUMO (23%), HOMO->L+1 (25%) |
| S18           | 338.93         | 0.39                     | 0.000   | 0.87  | -4.939  | LE   | H-2->L+3 (23%), H-1->L+7 (13%), HOMO->L+6 (13%), HOMO->L+9 (16%)   |
| S19           | 338.93         | 0.39                     | 0.000   | 0.87  | -4.645  | LE   | H-2->L+4 (23%), H-1->L+6 (13%), H-1->L+9 (16%), HOMO->L+7 (13%)    |
| S21           | 333.31         | 0.15                     | 0.000   | 0.89  | -4.707  | LE   | H-6->LUMO (25%), H-3->L+2 (21%), H-1->L+8 (14%)                    |
| S22           | 333.31         | 0.15                     | 0.000   | 0.89  | -4.539  | LE   | H-6->L+1 (25%), H-4->L+2 (21%), HOMO->L+8 (14%)                    |
| S48           | 270.54         | 0.47                     | 0.000   | 0.95  | -3.107  | LE   | H-4->L+4 (21%), H-3->L+3 (21%)                                     |
| S49           | 270.54         | 0.47                     | 0.000   | 0.95  | -2.116  | LE   | H-4->L+3 (21%), H-3->L+4 (21%)                                     |
| S51           | 266.00         | 0.16                     | 0.000   | 0.93  | -3.899  | LE   | H-5->L+4 (11%), H-2->L+3 (36%)                                     |
| S52           | 266.00         | 0.16                     | 0.000   | 0.93  | -3.315  | LE   | H-5->L+3 (11%), H-2->L+4 (36%)                                     |
| S58           | 262.47         | 0.21                     | 0.000   | 0.87  | -4.674  | LE   | H-6->LUMO (11%), H-3->L+2 (47%)                                    |
| S59           | 262.47         | 0.21                     | 0.000   | 0.87  | -3.593  | LE   | H-6->L+1 (11%), H-4->L+2 (47%)                                     |
| S69           | 249.98         | 0.75                     | 0.000   | 0.91  | -3.957  | LE   | H-3->L+5 (21%), H-3->L+12 (18%)                                    |
| S70           | 249.98         | 0.75                     | 0.000   | 0.91  | -4.144  | LE   | H-4->L+5 (21%), H-4->L+12 (18%)                                    |
| S81           | 243.83         | 0.70                     | 0.000   | 0.95  | -3.466  | LE   | H-3->L+12 (23%), H-1->L+13 (12%), HOMO->L+14 (12%)                 |
| S82           | 243.83         | 0.70                     | 0.000   | 0.95  | -2.821  | LE   | H-4->L+12 (23%), H-1->L+14 (12%), HOMO->L+13 (12%)                 |
| S92           | 235.04         | 0.11                     | 0.000   | 0.95  | -3.932  | LE   | H-18->LUMO (8%), H-4->L+5 (7%), H-4->L+11 (7%), H-3->L+10 (7%)     |
| S93           | 235.04         | 0.11                     | 0.000   | 0.95  | -2.623  | LE   | H-18->L+1 (8%), H-4->L+10 (7%), H-3->L+5 (7%)                      |

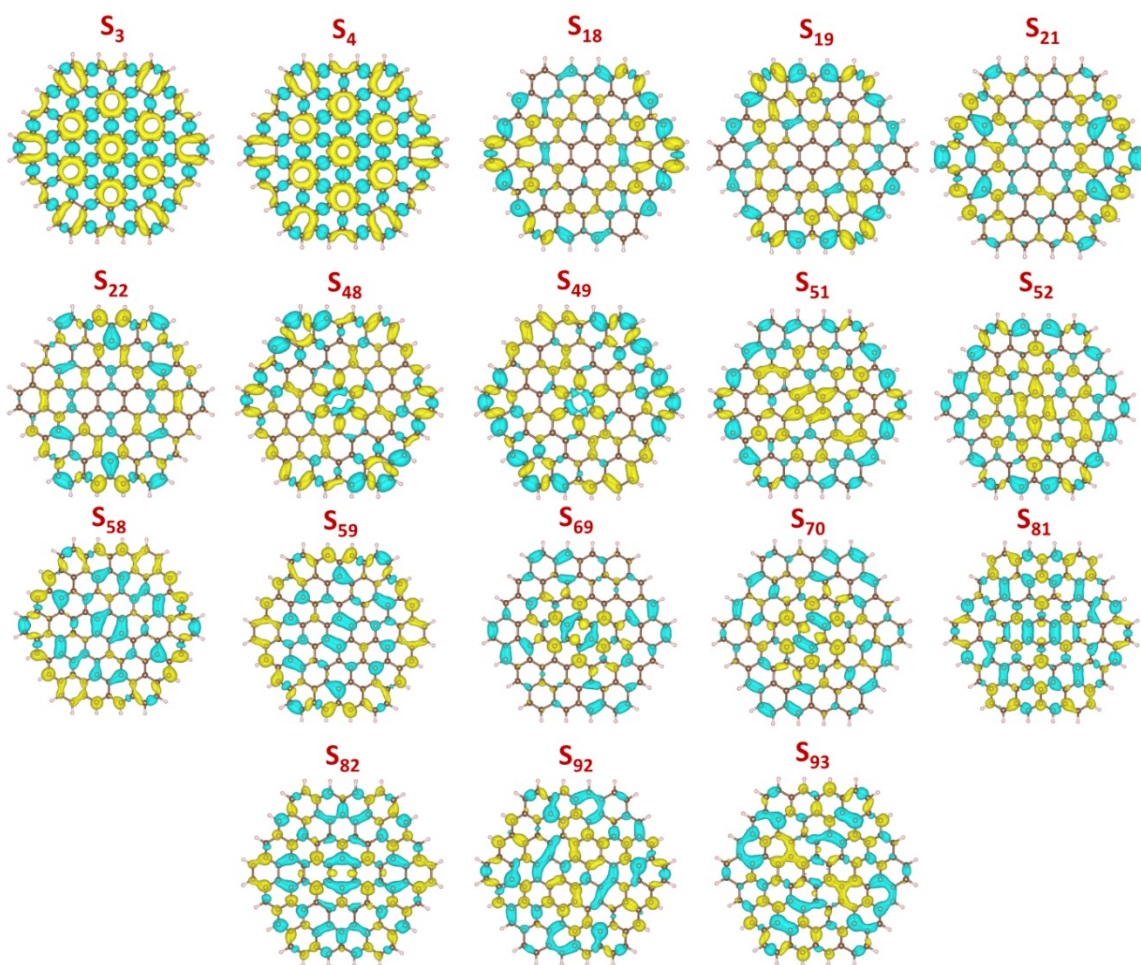

**Figure S17.** CDD for selected excited states (with the largest oscillator strength) in ZnO-free GQDs. Herein, yellow denotes positive charge distribution and cyan means negative charge distribution. Isosurface level is set to be 0.0003. All calculations are performed using CAM-B3LYP functional.

**Table S3.** Properties of dominant excited states (with oscillator strength  $f > 0.1$ ) in ZnOC<sub>94</sub> hybrid system. All calculations are performed using CAM-B3LYP functional.

| Excited state | Wavelength, nm | Oscillator strength, $f$ | $D$ , Å | $S_r$ | $t$ , Å | Type  | Major contribution                                              |
|---------------|----------------|--------------------------|---------|-------|---------|-------|-----------------------------------------------------------------|
| S1            | 672.54         | 0.08                     | 0.666   | 0.92  | -3.507  | LE    | H-1->L+1 (17%), HOMO->LUMO (72%)                                |
| S3            | 535.70         | 0.51                     | 1.433   | 0.85  | -2.391  | LE-CT | H-1->LUMO (26%), HOMO->L+1 (35%)                                |
| S4            | 513.68         | 0.43                     | 0.873   | 0.84  | -2.290  | LE-CT | H-1->L+1 (41%), HOMO->L+2 (22%)                                 |
| S5            | 489.26         | 0.32                     | 1.409   | 0.86  | -2.498  | LE-CT | H-2->L+1 (20%), H-1->L+1 (11%), H-1->L+2 (28%)                  |
| S6            | 482.16         | 0.36                     | 1.851   | 0.76  | -1.757  | LE-CT | H-1->L+1 (12%), HOMO->L+2 (44%)                                 |
| S7            | 471.88         | 0.23                     | 0.914   | 0.83  | -2.964  | LE-CT | -2->LUMO (38%), H-2->L+1 (12%), H-1->L+2 (10%)                  |
| S9            | 439.90         | 0.13                     | 1.439   | 0.79  | -2.231  | LE-CT | H-2->LUMO (11%), HOMO->L+2 (13%), HOMO->L+3 (32%)               |
| S10           | 431.97         | 0.19                     | 1.601   | 0.85  | -2.315  | LE-CT | H-4->LUMO (29%), H-2->LUMO (14%), HOMO->L+5 (13%)               |
| S11           | 412.31         | 0.38                     | 1.070   | 0.89  | -3.130  | LE-CT | H-2->L+1 (22%), H-1->L+2 (13%), H-1->L+3 (14%), HOMO->L+5 (16%) |
| S13           | 395.08         | 0.20                     | 0.477   | 0.87  | -2.610  | LE    | H-4->L+1 (10%), H-1->L+3 (16%), HOMO->L+6 (10%)                 |
| S17           | 378.90         | 0.26                     | 0.516   | 0.92  | -3.981  | LE    | H-3->LUMO (26%), HOMO->L+4 (20%)                                |
| S18           | 376.50         | 0.15                     | 1.414   | 0.86  | -2.728  | LE-CT | H-2->L+2 (15%), HOMO->L+4 (23%)                                 |
| S22           | 359.31         | 0.23                     | 0.401   | 0.87  | -3.867  | LE    | H-6->LUMO (26%)                                                 |
| S23           | 353.02         | 0.16                     | 0.738   | 0.87  | -3.086  | LE-CT | H-3->L+1 (12%), H-1->L+5 (11%), HOMO->L+9 (10%)                 |
| S24           | 349.38         | 0.15                     | 0.447   | 0.87  | -3.287  | LE    | H-2->L+3 (15%)                                                  |
| S36           | 317.52         | 0.10                     | 0.856   | 0.91  | -3.299  | LE    | H-7->LUMO (20%), HOMO->L+8 (16%)                                |
| S50           | 291.48         | 0.15                     | 0.552   | 0.88  | -3.634  | LE    | H-8->LUMO (20%), H-2->L+4 (17%)                                 |
| S51           | 290.03         | 0.18                     | 0.274   | 0.92  | -4.103  | LE    | H-10->L+1 (12%), HOMO->L+12 (17%)                               |
| S73           | 265.37         | 0.18                     | 0.815   | 0.91  | -3.576  | LE    | H-2->L+6 (9%), H-2->L+9 (5%)                                    |
| S75           | 263.45         | 0.11                     | 0.574   | 0.91  | -3.736  | LE    | H-10->L+2 (6%), H-5->L+5 (6%)                                   |
| S80           | 259.77         | 0.21                     | 1.053   | 0.91  | -3.101  | LE    | H-16->LUMO (7%), H-15->LUMO (5%), H-5->L+5 (5%)                 |
| S98           | 247.77         | 0.11                     | 0.470   | 0.92  | -3.556  | LE    | H-8->L+2 (7%), H-2->L+12 (6%), HOMO->L+14 (7%), HOMO->L+17 (8%) |



**Table S4.** Properties of dominant excited states (with oscillator strength  $f > 0.1$ ) in  $(\text{ZnO})_3\text{C}_{90}$  hybrid system. All calculations are performed using CAM-B3LYP functional.

| Excited state | Wavelength, nm | Oscillator strength, $f$ | $D$ , Å | $S_r$ | $t$ , Å | Type  | Major contribution                                             |
|---------------|----------------|--------------------------|---------|-------|---------|-------|----------------------------------------------------------------|
| S1            | 2295.57        | 0.03                     | 0.719   | 0.69  | -3.360  | LE    | HOMO->LUMO (95%)                                               |
| S5            | 641.34         | 0.45                     | 0.817   | 0.71  | -3.321  | LE    | HOMO->L+1 (90%)                                                |
| S8            | 560.20         | 0.52                     | 1.032   | 0.82  | -2.393  | LE-CT | H-5->LUMO (12%), H-1->L+1 (15%), HOMO->L+2 (52%)               |
| S9            | 554.26         | 0.69                     | 0.469   | 0.82  | -3.289  | LE    | H-3->LUMO (75%), H-1->L+2 (13%)                                |
| S10           | 537.35         | 0.13                     | 1.200   | 0.74  | -2.284  | LE-CT | H-7->LUMO (30%), H-5->LUMO (46%)                               |
| S17           | 442.04         | 0.18                     | 0.795   | 0.80  | -3.583  | LE    | H-9->LUMO (38%), H-8->LUMO (20%)                               |
| S19           | 413.92         | 0.15                     | 0.641   | 0.84  | -2.861  | LE    | H-2->L+1 (11%), HOMO->L+4 (45%)                                |
| S25           | 385.73         | 0.32                     | 0.353   | 0.88  | -1.864  | LE    | H-2->L+2 (18%), H-1->L+3 (18%), HOMO->L+7 (23%)                |
| S29           | 371.26         | 0.18                     | 0.277   | 0.86  | -3.879  | LE    | H-4->L+1 (12%), H-3->L+1 (51%)                                 |
| S30           | 365.29         | 0.10                     | 1.249   | 0.78  | -1.874  | LE-CT | H-2->L+2 (19%), H-1->L+3 (35%)                                 |
| S31           | 363.75         | 0.19                     | 1.194   | 0.84  | -2.464  | LE-CT | H-1->L+5 (28%), HOMO->L+8 (11%)                                |
| S33           | 355.27         | 0.19                     | 0.274   | 0.92  | -4.307  | LE    | H-3->L+2 (48%)                                                 |
| S35           | 352.64         | 0.10                     | 0.501   | 0.87  | -3.081  | LE    | H-1->L+7 (17%), HOMO->L+8 (29%)                                |
| S47           | 324.71         | 0.11                     | 1.209   | 0.84  | -3.053  | LE-CT | HOMO->L+9 (32%), HOMO->L+11 (12%)                              |
| S58           | 304.45         | 0.13                     | 0.631   | 0.85  | -3.031  | LE    | H-2->L+5 (23%)                                                 |
| S67           | 290.17         | 0.10                     | 0.390   | 0.89  | -2.803  | LE    | H-22->LUMO (10%), H-9->L+1 (13%)                               |
| S70           | 286.99         | 0.13                     | 0.185   | 0.87  | -3.842  | LE    | H-4->L+4 (13%), H-2->L+6 (10%)                                 |
| S87           | 271.35         | 0.18                     | 0.185   | 0.88  | -2.095  | LE    | HOMO->L+15 (24%)                                               |
| S88           | 270.97         | 0.15                     | 0.176   | 0.91  | -3.828  | LE    | H-12->L+1 (5%), H-11->L+2 (6%), H-2->L+7 (7%), HOMO->L+19 (8%) |
| S98           | 263.39         | 0.21                     | 0.725   | 0.87  | -3.500  | LE    | H-3->L+6 (19%)                                                 |

**Table S5.** Properties of dominant excited states (with oscillator strength  $f > 0.1$ ) in  $(\text{ZnO})_4\text{C}_{88}$  hybrid system. All calculations are performed using CAM-B3LYP functional.

| Excited state | Wavelength, nm | Oscillator strength, $f$ | $D$ , Å | $S_r$ | $t$ , Å | Type  | Major contribution                                                             |
|---------------|----------------|--------------------------|---------|-------|---------|-------|--------------------------------------------------------------------------------|
| S1            | 670.65         | 0                        | 0.900   | 0.87  | -3.521  | LE    | H-1->L+1 (31%), HOMO->LUMO (62%)                                               |
| S2            | 568.91         | 0.29                     | 0.594   | 0.86  | -3.486  | LE    | H-1->LUMO (84%)                                                                |
| S4            | 508.34         | 0.32                     | 1.441   | 0.79  | -2.604  | LE-CT | H-1->L+2 (24%), H-1->L+3 (13%), HOMO->L+1 (54%)                                |
| S6            | 490.89         | 0.14                     | 1.563   | 0.79  | -2.321  | LE-CT | H-1->L+2 (28%), H-1->L+3 (19%), HOMO->L+1 (32%)                                |
| S10           | 428.72         | 1.25                     | 0.850   | 0.87  | -3.463  | LE    | H-3->LUMO (12%), H-2->L+1 (30%), HOMO->L+2 (16%), HOMO->L+3 (15%)              |
| S12           | 404.33         | 0.13                     | 1.055   | 0.83  | -2.162  | LE-CT | H-2->L+2 (19%), H-1->L+6 (37%)                                                 |
| S14           | 390.08         | 0.22                     | 0.814   | 0.86  | -3.167  | LE    | H-4->LUMO (12%), H-2->L+1 (12%), H-1->L+8 (17%), HOMO->L+6 (22%)               |
| S18           | 372.33         | 0.22                     | 0.122   | 0.84  | -4.389  | LE    | H-6->LUMO (17%), H-4->LUMO (13%), H-1->L+4 (19%)                               |
| S22           | 362.57         | 0.24                     | 0.989   | 0.87  | -3.014  | LE    | H-4->L+1 (11%), H-2->L+2 (14%), H-1->L+9 (17%), HOMO->L+5 (13%)                |
| S23           | 360.35         | 0.13                     | 0.139   | 0.87  | -1.215  | LE    | HOMO->L+5 (13%), HOMO->L+8 (11%)                                               |
| S26           | 351.83         | 0.49                     | 0.602   | 0.90  | -3.570  | LE    | H-5->LUMO (20%), H-2->L+2 (27%)                                                |
| S30           | 337.67         | 0.12                     | 1.091   | 0.91  | -3.687  | LE    | H-3->L+1 (46%), HOMO->L+4 (13%)                                                |
| S34           | 322.90         | 0.15                     | 0.912   | 0.90  | -3.509  | LE    | H-6->L+1 (10%), H-5->LUMO (10%), HOMO->L+8 (15%)                               |
| S53           | 291.72         | 0.17                     | 1.125   | 0.91  | -3.074  | LE    | H-11->LUMO (10%), H-7->LUMO (10%)                                              |
| S57           | 285.88         | 0.30                     | 1.067   | 0.83  | -2.624  | LE    | H-1->L+11 (13%), HOMO->L+13 (14%)                                              |
| S59           | 284.93         | 0.33                     | 0.584   | 0.87  | -3.256  | LE    | H-14->LUMO (9%), H-12->LUMO (6%), H-9->LUMO (8%), H-7->L+1 (7%), H-5->L+1 (6%) |
| S61           | 283.54         | 0.19                     | 0.971   | 0.75  | -1.470  | LE-CT | H-1->L+15 (20%)                                                                |
| S63           | 282.48         | 0.20                     | 0.506   | 0.90  | -3.420  | LE    | H-4->L+5 (11%), H-1->L+12 (10%)                                                |
| S73           | 270.24         | 0.14                     | 0.574   | 0.85  | -2.895  | LE    | H-9->L+2 (13%), HOMO->L+14 (10%)                                               |
| S90           | 258.22         | 0.19                     | 0.218   | 0.90  | -3.507  | LE    | H-1->L+19 (16%)                                                                |
| S99           | 252.93         | 0.15                     | 0.380   | 0.89  | -1.912  | LE    | H-19->LUMO (8%), H-15->LUMO (9%), H-11->L+2 (3%), H-5->L+7 (6%)                |

**Table S6.** Properties of dominant excited states (with oscillator strength  $f > 0.1$ ) in  $(\text{ZnO})_7\text{C}_{82}$  hybrid system. All calculations are performed using CAM-B3LYP functional.

| Excited state | Wavelength, nm | Oscillator strength, $f$ | $D$ , Å | $S_r$ | $t$ , Å | Type  | Major contribution                                                |
|---------------|----------------|--------------------------|---------|-------|---------|-------|-------------------------------------------------------------------|
| S1            | 810.61         | 0.19                     | 2.561   | 0.61  | -1.273  | LE-CT | H-2->LUMO (18%), HOMO->LUMO (73%)                                 |
| S5            | 559.69         | 0.21                     | 6.079   | 0.50  | 2.578   | CT    | H-5->LUMO (15%), H-2->LUMO (54%), HOMO->LUMO (18%)                |
| S7            | 499.91         | 0.32                     | 1.375   | 0.74  | -1.965  | LE-CT | HOMO->L+1 (74%)                                                   |
| S8            | 478.61         | 0.16                     | 3.937   | 0.57  | 0.564   | CT    | H-6->LUMO (52%), H-5->LUMO (36%)                                  |
| S11           | 412.56         | 0.19                     | 1.116   | 0.73  | -1.276  | LE-CT | H-4->L+1 (28%), H-3->L+1 (32%), HOMO->L+2 (13%)                   |
| S13           | 404.68         | 0.20                     | 0.481   | 0.78  | -3.463  | LE    | H-6->L+1 (10%), H-5->L+1 (10%), H-2->L+1 (24%)                    |
| S14           | 403.41         | 0.11                     | 3.054   | 0.57  | -0.207  | LE-CT | H-12->LUMO (23%), H-8->LUMO (14%), H-7->LUMO (27%)                |
| S16           | 396.11         | 0.52                     | 1.887   | 0.83  | -2.727  | LE-CT | H-4->L+1 (13%), HOMO->L+2 (43%)                                   |
| S19           | 376.33         | 0.18                     | 1.052   | 0.83  | -2.774  | LE-CT | H-18->LUMO (11%), H-4->L+2 (13%), H-3->L+2 (25%)                  |
| S29           | 344.65         | 0.10                     | 2.830   | 0.81  | -1.232  | LE-CT | H-1->L+2 (31%)                                                    |
| S31           | 341.45         | 0.12                     | 0.837   | 0.79  | -1.058  | LE-CT | H-4->L+1 (15%), HOMO->L+5 (13%)                                   |
| S32           | 341.25         | 0.19                     | 1.557   | 0.86  | -2.375  | LE-CT | HOMO->L+6 (14%)                                                   |
| S39           | 325.40         | 0.12                     | 2.372   | 0.80  | -1.877  | LE-CT | H-23->LUMO (11%)                                                  |
| S40           | 323.52         | 0.92                     | 0.907   | 0.85  | -2.464  | LE    | H-5->L+2 (10%), H-2->L+3 (13%)                                    |
| S44           | 317.38         | 0.22                     | 2.668   | 0.77  | -1.644  | LE-CT | H-11->LUMO (10%), H-10->LUMO (18%)                                |
| S46           | 313.24         | 0.11                     | 1.600   | 0.72  | -0.293  | LE-CT | H-2->L+3 (19%)                                                    |
| S49           | 308.90         | 0.13                     | 2.084   | 0.78  | -1.691  | LE-CT | H-19->LUMO (12%), H-12->LUMO (10%), H-2->L+3 (11%)                |
| S51           | 307.92         | 0.18                     | 2.782   | 0.60  | 0.095   | CT    | H-4->L+10 (10%), H-3->L+10 (11%), H-1->L+8 (13%), H-1->L+10 (12%) |
| S60           | 295.58         | 0.11                     | 2.770   | 0.78  | -1.253  | LE-CT | H-16->LUMO (18%), H-14->LUMO (13%)                                |
| S65           | 292.04         | 0.33                     | 1.116   | 0.84  | -2.992  | LE-CT | H-3->L+5 (16%), HOMO->L+8 (10%)                                   |
| S67           | 289.11         | 0.11                     | 1.013   | 0.81  | -1.376  | LE-CT | H-4->L+5 (15%), H-3->L+5 (13%)                                    |
| S71           | 285.09         | 0.10                     | 0.574   | 0.81  | -3.000  | LE    | H-6->L+3 (11%)                                                    |
| S89           | 270.34         | 0.15                     | 0.881   | 0.80  | -2.535  | LE    | HOMO->L+12 (11%)                                                  |

**Table S7.** Properties of dominant excited states (with oscillator strength  $f > 0.1$ ) in  $(\text{ZnO})_{12}\text{C}_{72}$  hybrid system. All calculations are performed using CAM-B3LYP functional.

| Excited state | Wavelength, nm | Oscillator strength, $f$ | $D$ , Å | $S_r$ | $t$ , Å | Type  | Major contribution                                                                                       |
|---------------|----------------|--------------------------|---------|-------|---------|-------|----------------------------------------------------------------------------------------------------------|
| S1            | 532.92         | 0                        | 3.866   | 0.21  | 1.663   | CT    | H-1->LUMO (86%)                                                                                          |
| S10           | 388.14         | 0.10                     | 0.220   | 0.90  | -3.632  | LE    | H-1->L+3 (20%), HOMO->L+4 (20%)                                                                          |
| S11           | 388.14         | 0.10                     | 0.223   | 0.90  | -4.638  | LE    | H-1->L+4 (20%), HOMO->L+3 (20%)                                                                          |
| S21           | 341.35         | 0.78                     | 0.553   | 0.84  | -2.199  | LE    | H-5->L+3 (13%)                                                                                           |
| S22           | 341.35         | 0.78                     | 0.552   | 0.84  | -2.394  | LE    | H-5->L+4 (13%)                                                                                           |
| S24           | 327.05         | 1.18                     | 0.379   | 0.82  | -2.468  | LE    | H-3->L+6 (8%), H-3->L+9 (9%), H-2->L+5 (8%), H-1->L+3 (5%), H-1->L+8 (4%), H-1->L+9 (9%), HOMO->L+4 (5%) |
| S25           | 327.05         | 1.18                     | 0.373   | 0.83  | -2.783  | LE    | H-3->L+5 (8%), H-2->L+9 (9%), H-1->L+4 (5%), H-1->L+5 (2%), HOMO->L+3 (5%), HOMO->L+9 (9%)               |
| S26           | 325.68         | 0.21                     | 2.970   | 0.46  | 0.963   | CT    | H-4->L+1 (25%)                                                                                           |
| S27           | 325.66         | 0.21                     | 2.980   | 0.46  | 0.820   | CT    | H-4->L+2 (25%)                                                                                           |
| S30           | 316.42         | 0.17                     | 2.564   | 0.55  | 0.916   | CT    | H-8->LUMO (12%), H-3->L+2 (12%), H-2->L+1 (12%)                                                          |
| S31           | 316.42         | 0.17                     | 2.566   | 0.55  | 0.920   | CT    | H-9->LUMO (12%), H-3->L+1 (12%), H-2->L+2 (12%)                                                          |
| S33           | 308.94         | 0.18                     | 2.101   | 0.64  | 0.394   | CT    | H-3->L+2 (14%), H-2->L+1 (14%)                                                                           |
| S34           | 308.94         | 0.18                     | 2.109   | 0.64  | 0.399   | CT    | H-3->L+1 (14%), H-2->L+2 (14%)                                                                           |
| S36           | 303.55         | 0.38                     | 1.074   | 0.77  | -0.887  | LE-CT | H-3->L+7 (14%)                                                                                           |
| S37           | 303.55         | 0.38                     | 1.061   | 0.77  | -0.765  | LE-CT | H-2->L+7 (14%)                                                                                           |
| S43           | 295.27         | 0.15                     | 1.660   | 0.71  | -0.460  | LE-CT | HOMO->L+7 (19%)                                                                                          |
| S44           | 295.26         | 0.15                     | 1.650   | 0.71  | -0.495  | LE-CT | H-1->L+7 (19%)                                                                                           |
| S52           | 287.37         | 0.18                     | 1.923   | 0.68  | 0.127   | CT    | H-13->LUMO (10%), H-9->LUMO (11%)                                                                        |
| S53           | 287.37         | 0.18                     | 1.923   | 0.68  | 0.130   | CT    | H-12->LUMO (10%), H-8->LUMO (11%)                                                                        |

**Table S8.** Properties of dominant excited states (with oscillator strength  $f > 0.1$ ) in  $(\text{ZnO})_{27}\text{C}_{42}$  hybrid system. All calculations are performed using CAM-B3LYP functional.

| Excited state   | Wavelength, nm | Oscillator strength, $f$ | $D$ , Å | $S_r$ | $t$ , Å | Type  | Major contribution                                               |
|-----------------|----------------|--------------------------|---------|-------|---------|-------|------------------------------------------------------------------|
| S <sub>1</sub>  | 613.44         | 0.002                    | 4.087   | 0.20  | 1.882   | CT    | HOMO->LUMO (80%)                                                 |
| S <sub>6</sub>  | 453.52         | 1.73                     | 1.220   | 0.75  | -1.274  | LE-CT | H-1->L+1 (13%), H-1->L+3 (12%), HOMO->L+2 (13%), HOMO->L+4 (12%) |
| S <sub>7</sub>  | 453.52         | 1.73                     | 1.216   | 0.75  | -1.540  | LE-CT | H-1->L+2 (13%), H-1->L+4 (12%), HOMO->L+1 (13%), HOMO->L+3 (12%) |
| S <sub>8</sub>  | 446.87         | 0.72                     | 2.795   | 0.54  | 0.057   | CT    | H-1->L+1 (14%), H-1->L+3 (12%), HOMO->L+2 (14%), HOMO->L+4 (12%) |
| S <sub>9</sub>  | 446.85         | 0.72                     | 2.791   | 0.54  | 0.113   | CT    | H-1->L+2 (14%), H-1->L+4 (12%), HOMO->L+1 (14%), HOMO->L+3 (12%) |
| S <sub>66</sub> | 277.94         | 0.25                     | 1.650   | 0.61  | -0.870  | LE-CT | H-12->LUMO (16%)                                                 |
| S <sub>67</sub> | 277.94         | 0.25                     | 1.676   | 0.61  | -0.919  | LE-CT | H-11->LUMO (16%)                                                 |
| S <sub>72</sub> | 273.98         | 0.17                     | 2.183   | 0.56  | -0.562  | LE-CT | H-11->LUMO (25%)                                                 |
| S <sub>73</sub> | 273.96         | 0.17                     | 2.148   | 0.56  | -0.625  | LE-CT | H-12->LUMO (25%)                                                 |

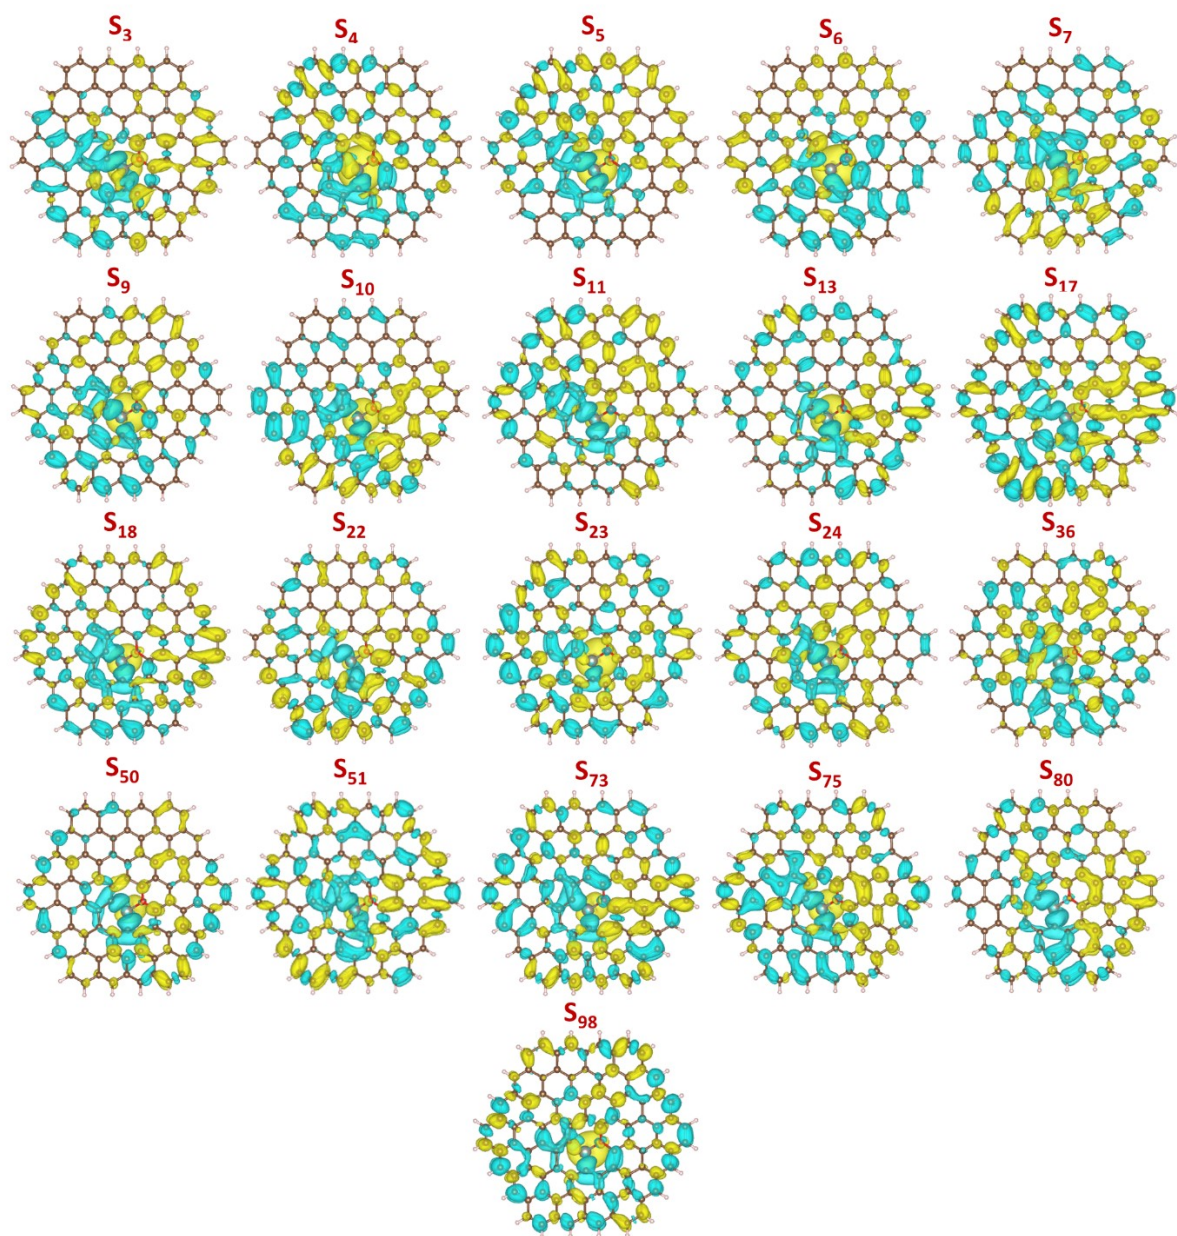

**Figure S18.** CDD for selected excited states (with the largest oscillator strength) in ZnOC<sub>94</sub>.

Herein, yellow denotes positive charge distribution and cyan means negative charge distribution. Isosurface level is set to be 0.0003. All calculations are performed using CAM-B3LYP functional.

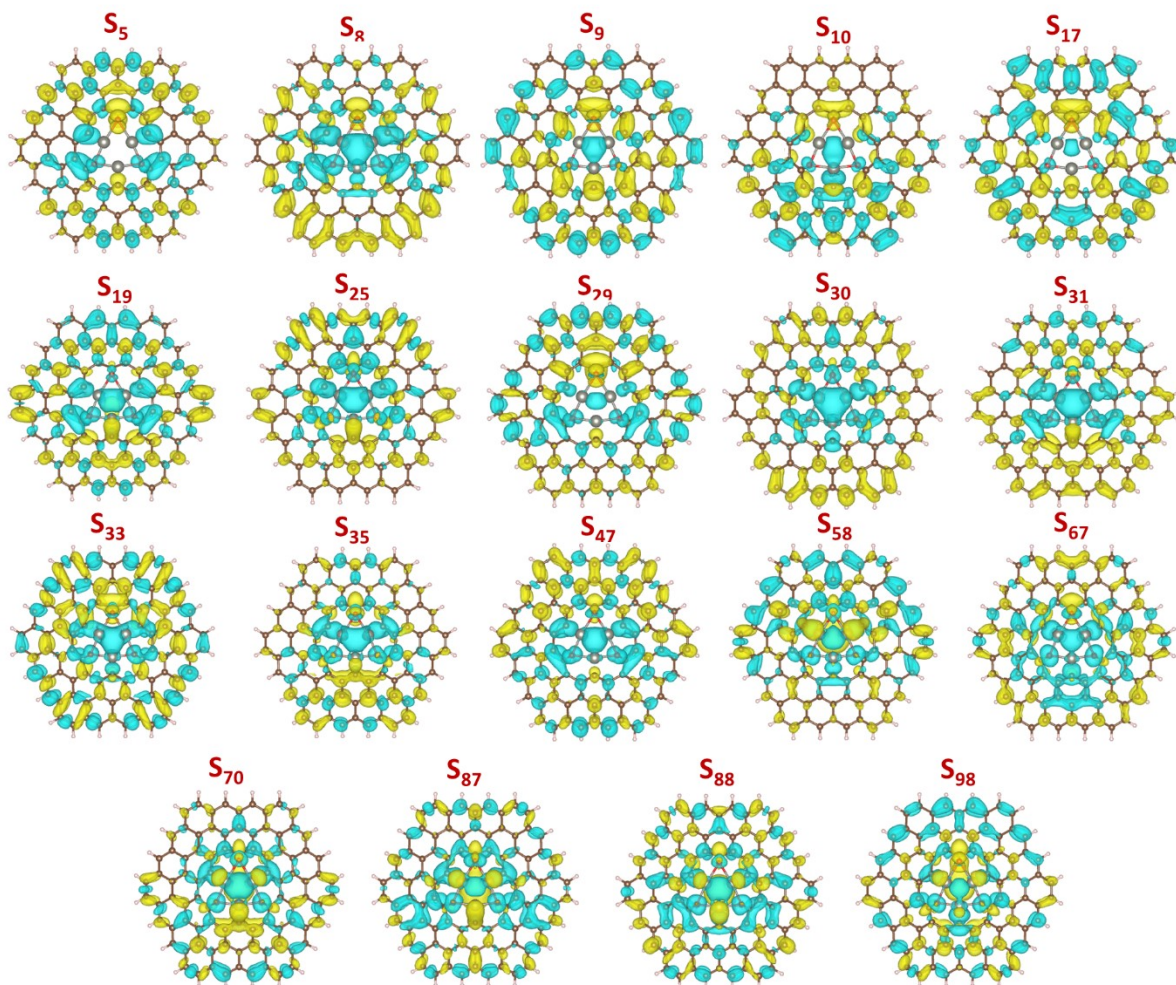

**Figure S19.** CDD for selected excited states (with the largest oscillator strength) in  $(\text{ZnO})_3\text{C}_{90}$ . Herein, yellow denotes positive charge distribution and cyan means negative charge distribution. Isosurface level is set to be 0.0003. All calculations are performed using CAM-B3LYP functional.

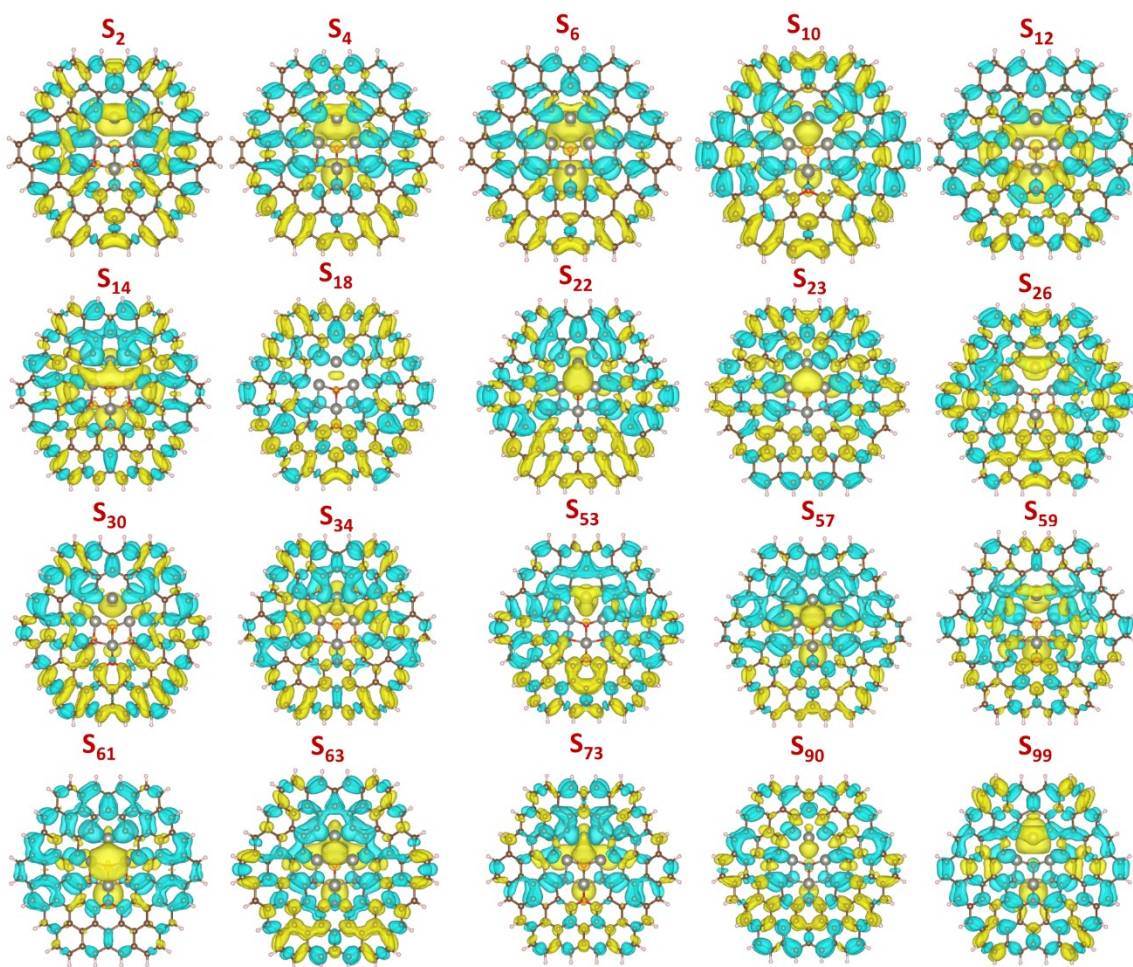

**Figure S20.** CDD for selected excited states (with the largest oscillator strength) in  $(\text{ZnO})_4\text{C}_{88}$ . Herein, yellow denotes positive charge distribution and cyan means negative charge distribution. Isosurface level is set to be 0.0003. All calculations are performed using CAM-B3LYP functional.



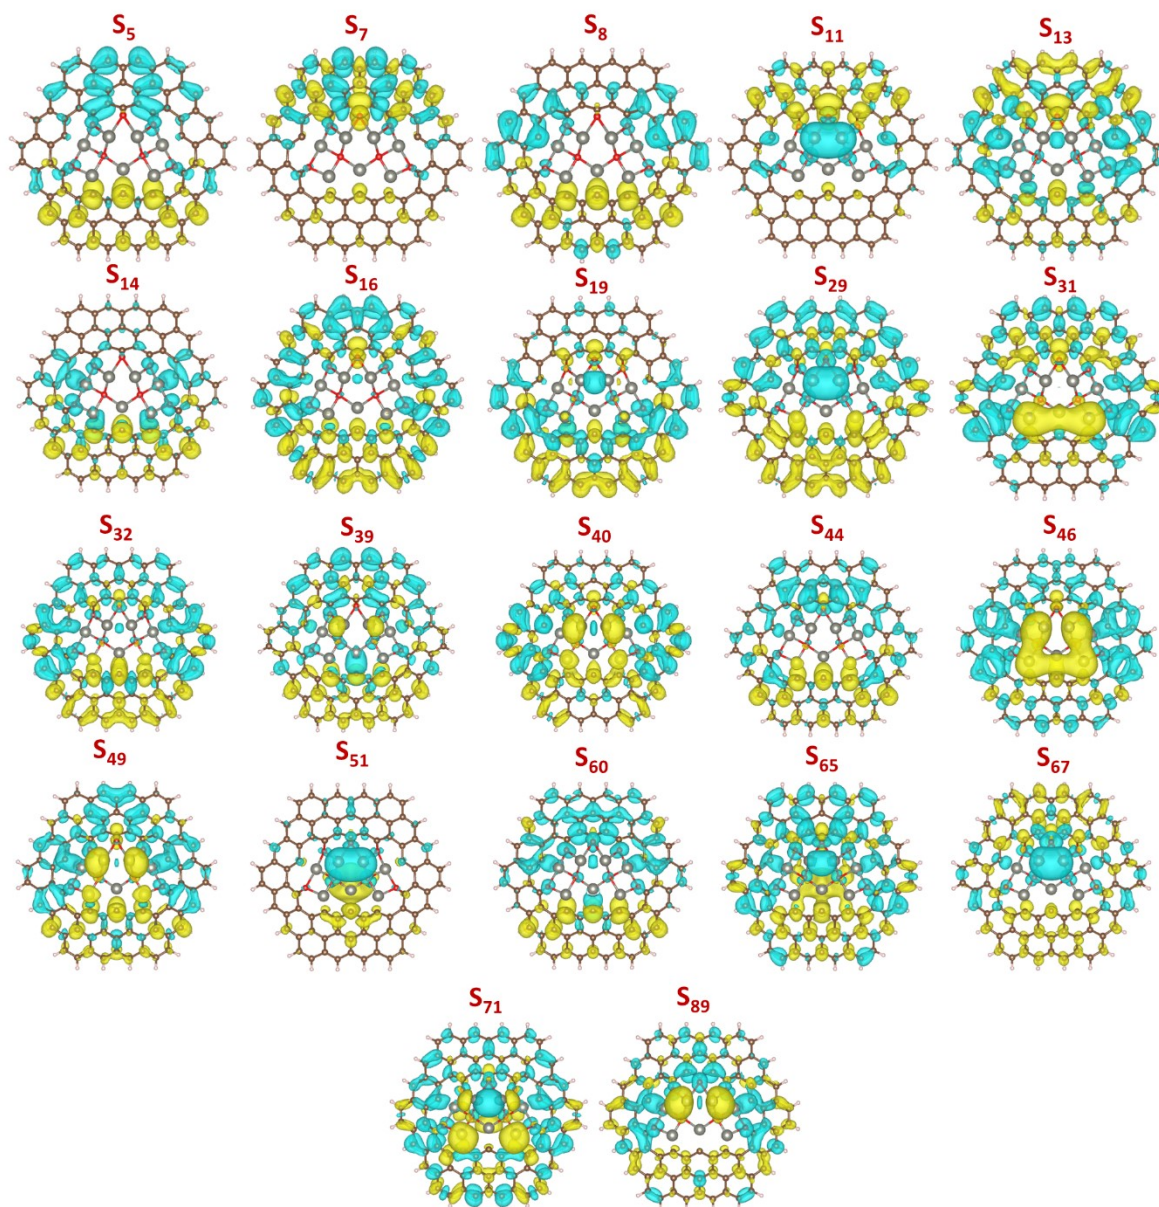

**Figure S21.** CDD for selected excited states (with the largest oscillator strength) in  $(\text{ZnO})_7\text{C}_{82}$ . Herein, yellow denotes positive charge distribution and cyan means negative charge distribution. Isosurface level is set to be 0.0003. All calculations are performed using CAM-B3LYP functional.

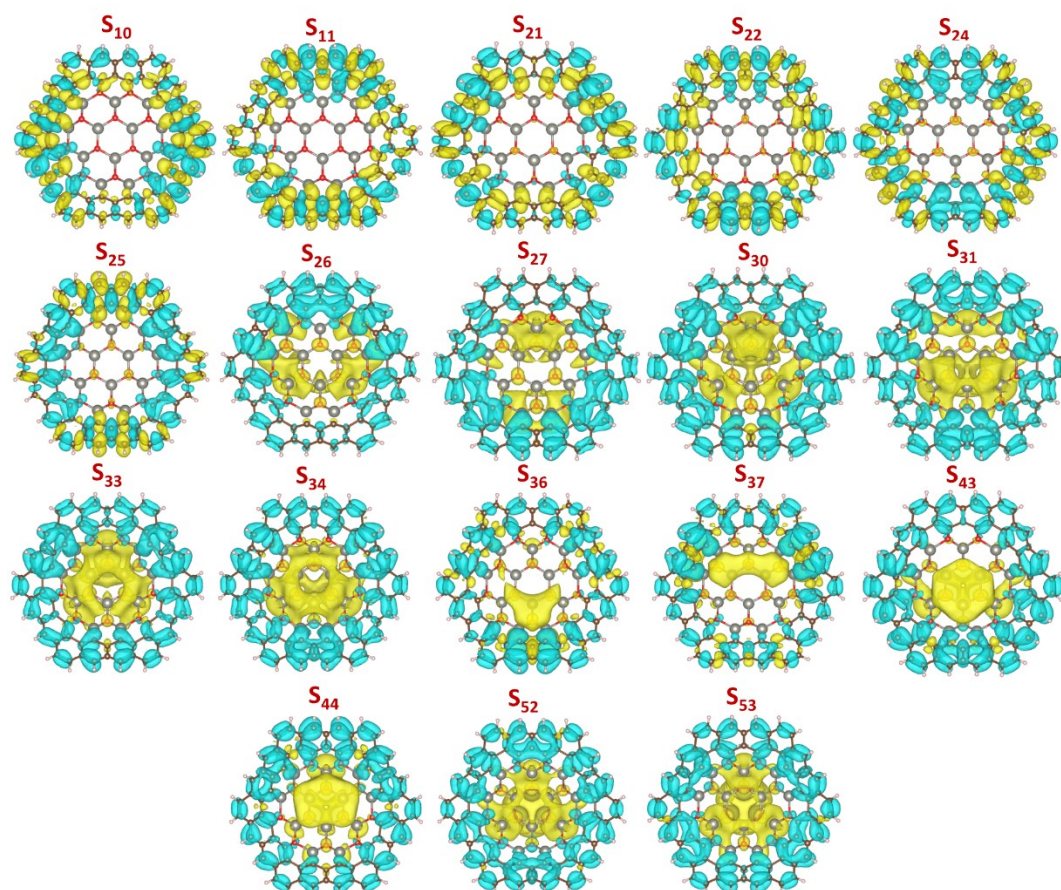

**Figure S22.** CDD for selected excited states (with the largest oscillator strength) in  $(\text{ZnO})_{12}\text{C}_{72}$ . Herein, yellow denotes positive charge distribution and cyan means negative charge distribution. Isosurface level is set to be 0.0003.

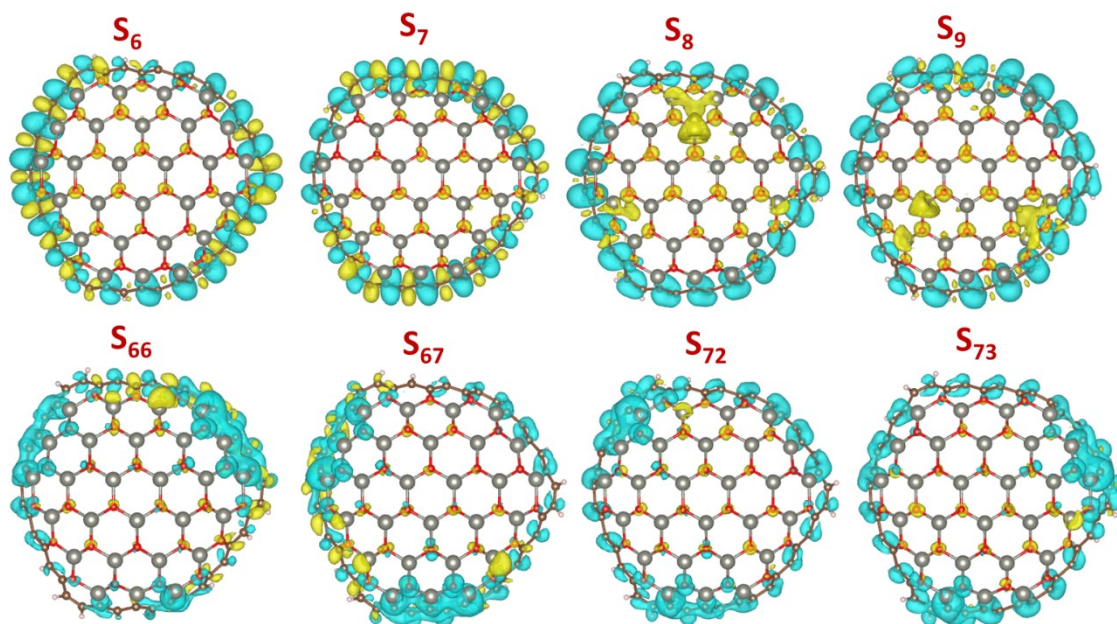

**Figure S23.** CDD for selected excited states (with the largest oscillator strength) in  $(\text{ZnO})_{27}\text{C}_{42}$ . Herein, yellow denotes positive charge distribution and cyan means negative charge distribution. Isosurface level is set to be 0.0003. All calculations are performed using CAM-B3LYP functional.

**Table S9.** Properties of dominant excited states in  $(\text{ZnO})_n\text{C}_{96-2n}$  hybrid systems. For doubly degenerate excited states, the properties of second state adjacent to first state are included in square brackets. All calculations are performed using PBE0 functional.

| System                           | Excited state | Wavelength, nm | Oscillator strength, $f$ | $D$ , Å | $S_r$ | $t$ , Å | Type  | Major contribution                                                                                                                  |
|----------------------------------|---------------|----------------|--------------------------|---------|-------|---------|-------|-------------------------------------------------------------------------------------------------------------------------------------|
| $\text{C}_{96}$                  | $S_{3,4}$     | 542.86         | 1.27                     | 0       | 0.96  | -1.94   | LE    | H-1→LUMO (43%), HOMO→L+1(43%)<br>[H-1→L+1 (43%), HOMO→LUMO (43%)]                                                                   |
|                                  | $S_{48,49}$   | 335.47         | 0.45                     | 0       | 0.95  | -2.61   | LE    | H-8→LUMO (11%), H-7→L+1(11%),<br>H-4→L+3 (22%), H-3→L+4 (22%)<br>[H-8→L+1(11%), H-7→LUMO (11%),<br>H-4→L+4 (22%), H-3→L+3 (22%)]    |
|                                  | $S_{76,77}$   | 290.95         | 0.46                     | 0       | 0.91  | -3.81   | LE    | H-5→L+3 (58%) [H-5→L+4 (58%)]                                                                                                       |
| $\text{ZnOC}_{94}$               | $S_3$         | 675.22         | 0.28                     | 1.97    | 0.84  | -1.97   | LE-CT | H-2→LUMO (18%), H-1→LUMO (26%),<br>HOMO→L+1 (38%)                                                                                   |
|                                  | $S_4$         | 628.63         | 0.26                     | 1.06    | 0.85  | -2.82   | LE-CT | H-1→L+1 (49%), HOMO→L+2 (34%)                                                                                                       |
|                                  | $S_5$         | 605.3          | 0.26                     | 2.03    | 0.83  | -1.98   | LE-CT | H-1→L+1 (21%), HOMO→L+2 (55%)                                                                                                       |
| $(\text{ZnO})_3\text{C}_{90}$    | $S_{10}$      | 696.97         | 0.71                     | 0.52    | 0.86  | -3.63   | LE    | H-4→LUMO (49%), H-3→LUMO (13%), H-<br>1→L+2 (10%), HOMO→L+1 (21%)                                                                   |
|                                  | $S_{28}$      | 474.2          | 0.27                     | 0.47    | 0.89  | -4.16   | LE    | H-4→L+1 (20%), H-2→L+4 (46%)                                                                                                        |
|                                  | $S_{29}$      | 472.66         | 0.32                     | 0.69    | 0.86  | -3.58   | LE    | H-12→LUMO (51%), H-2→L+1 (11%), H-<br>1→L+6 (12%)                                                                                   |
| $(\text{ZnO})_4\text{C}_{88}$    | $S_5$         | 658.09         | 0.41                     | 3.78    | 0.80  | -0.53   | LE-CT | H-1→LUMO (17%), H-1→L+2 (18%),<br>HOMO→L+1 (57%)                                                                                    |
|                                  | $S_{10}$      | 532.56         | 0.44                     | 1.67    | 0.91  | -2.95   | LE-CT | H-4→LUMO (10%), H-2→L+1 (54%),<br>HOMO→L+2 (16%)                                                                                    |
|                                  | $S_{16}$      | 480.26         | 0.36                     | 1.47    | 0.87  | -3.05   | LE    | H-5→LUMO (11%), H-3→LUMO (31%), H-<br>1→L+4 (26%), H-1→L+5 (21%)                                                                    |
| $(\text{ZnO})_7\text{C}_{82}$    | $S_8$         | 612.42         | 0.39                     | 0.61    | 0.75  | -1.57   | LE    | HOMO→L+1 (84%)                                                                                                                      |
|                                  | $S_{11}$      | 555.71         | 0.27                     | 5.97    | 0.65  | 1.58    | CT    | HOMO→L+2 (85%)                                                                                                                      |
|                                  | $S_{85}$      | 341.34         | 0.28                     | 0.52    | 0.85  | -3.36   | LE    | H-5→L+7 (15%), H-4→L+8 (38%)                                                                                                        |
| $(\text{ZnO})_{12}\text{C}_{72}$ | $S_{37,38}$   | 407.09         | 0.60                     | 1.53    | 0.81  | -2.47   | LE-CT | H-9→LUMO (16%), H-4→L+3 (18%),<br>H-3→L+6 (13%), H-2→L+5 (13%)<br>[H-8→LUMO (16%), H-4→L+4 (18%),<br>H-3→L+5 (13%), H-2→L+6 (13%)]  |
|                                  | $S_{43,44}$   | 388.26         | 0.38                     | 1.30    | 0.85  | -2.69   | LE-CT | H-11→LUMO (12%), H-4→L+3 (16%),<br>HOMO→L+7 (38%)<br>[H-10→LUMO (12%), H-4→L+4 (16%),<br>H-1→L+7 (38%)]                             |
|                                  | $S_{52,53}$   | 375.48         | 0.21                     | 2.35    | 0.82  | -2.68   | LE-CT | H-4→L+6 (13%), HOMO→L+8 (61%)<br>[H-4→L+5 (13%), H-1→L+8 (61%)]                                                                     |
| $(\text{ZnO})_{27}\text{C}_{42}$ | $S_{10,11}$   | 635.52         | 1.55                     | 0.24    | 0.89  | -5.25   | LE    | H-1→L+4 (46%), HOMO→L+3 (46%)<br>[H-1→L+3 (46%), HOMO→L+4 (46%)]                                                                    |
|                                  | $S_{23,24}$   | 496.79         | 0.51                     | 1.06    | 0.88  | -4.41   | LE-CT | H-2→L+4 (15%), H-1→L+9 (11%),<br>HOMO→L+8 (40%), HOMO→L+9 (19%)<br>[H-2→L+3 (15%), H-1→L+8 (40%),<br>H-1→L+9 (19%), HOMO→L+9 (11%)] |
|                                  | $S_{27,28}$   | 466.6          | 0.27                     | 1.33    | 0.86  | -3.63   | LE-CT | H-3→L+3 (19%), H-3→L+4 (10%),<br>H-1→L+8 (12%), HOMO→L+9 (32%)<br>[H-3→L+3 (10%), H-3→L+4 (19%),<br>H-1→L+9 (32%), HOMO→L+8 (12%)]  |

**Table S10.** Properties of excited states (with oscillator strength  $f > 0.1$ ) in  $(\text{ZnO})_n\text{C}_{96-2n}$  hybrid systems. For doubly degenerate excited states, the properties of second state adjacent to first state are included in square brackets. All calculations are performed using PBE0 functional.

| System                           | Excited state | Wavelength, nm | $f$  | $D$ , Å | $S_r$ | $t$ , Å | Type                           | Major contribution                                                                                                                                                     |
|----------------------------------|---------------|----------------|------|---------|-------|---------|--------------------------------|------------------------------------------------------------------------------------------------------------------------------------------------------------------------|
| $\text{C}_{96}$                  | $S_{21,22}$   | 381.22         | 0.16 | 0       | 0.83  | -3.92   | LE                             | H-6->LUMO (26%), H-3->L+2 (20%), H-1->L+5 (12%), H-1->L+8 (11%), HOMO->L+6 (12%)<br>[H-6->L+1 (26%), H-4->L+2 (20%), H-1->L+6 (12%), HOMO->L+5 (12%), HOMO->L+8 (11%)] |
|                                  | $S_{41,42}$   | 345.27         | 0.1  | 0       | 0.88  | -2.87   | LE                             | H-6->LUMO (16%), H-3->L+2 (10%), H-2->L+3 (14%), HOMO->L+9 (50%)<br>[H-6->L+1 (16%), H-4->L+2 (10%), H-2->L+4 (14%), H-1->L+9 (50%)]                                   |
|                                  | $S_{46,47}$   | 341.27         | 0.24 | 0       | 0.80  | -1.26   | LE                             | H-9->LUMO (61%), H-4->L+4 (11%), H-3->L+3 (11%) [H-9->L+1 (61%), H-4->L+3 (11%), H-3->L+4 (11%)]                                                                       |
|                                  | $S_{72,73}$   | 296.42         | 0.24 | 0       | 0.77  | -4.50   | LE                             | H-13->L+1(21%),H-12->LUMO(21%),H-3->L+7 (42%)<br>[H-13->LUMO(21%),H-12->L+1(21%),H-4->L+7 (42%)]                                                                       |
| $\text{ZnOC}_{94}$               | $S_6$         | 590.45         | 0.23 | 1.75    | 0.73  | -2.50   | LE-CT                          | H-2->LUMO (58%), H-1->L+2 (13%)                                                                                                                                        |
|                                  | $S_7$         | 584.08         | 0.16 | 1.03    | 0.81  | -3.30   | LE-CT                          | H-2->L+1 (25%), H-1->L+2 (44%)                                                                                                                                         |
|                                  | $S_9$         | 543.52         | 0.20 | 3.36    | 0.67  | -0.86   | LE-CT                          | H-3->LUMO (62%)                                                                                                                                                        |
|                                  | $S_{10}$      | 533.93         | 0.15 | 1.01    | 0.70  | -2.19   | LE-CT                          | H-2->L+1 (28%), H-1->L+2 (12%), H-1->L+3 (22%)                                                                                                                         |
|                                  | $S_{13}$      | 494.15         | 0.14 | 2.33    | 0.70  | -1.91   | LE-CT                          | H-3->L+1 (41%), HOMO->L+5 (27%)                                                                                                                                        |
|                                  | $S_{17}$      | 467.15         | 0.12 | 0.47    | 0.77  | -3.24   | LE                             | H-4->LUMO(23%),H-2->L+2(16%),HOMO->L+4(19%)                                                                                                                            |
|                                  | $S_{24}$      | 437.99         | 0.20 | 1.90    | 0.68  | -1.95   | LE-CT                          | H-3->L+2 (29%), H-2->L+2 (18%)                                                                                                                                         |
|                                  | $S_{44}$      | 369.50         | 0.15 | 1.41    | 0.63  | -3.03   | LE-CT                          | H-8->L+1(12%), H-3->L+4 (26%), HOMO->L+10 (13%)                                                                                                                        |
|                                  | $S_{61}$      | 341.36         | 0.17 | 2.55    | 0.60  | -1.53   | LE-CT                          | H-5->L+3 (16%), H-3->L+6 (26%)                                                                                                                                         |
| $S_{100}$                        | 298.22        | 0.12           | 0.28 | 0.63    | -4.01 | LE      | H-15->L+1 (16%)                |                                                                                                                                                                        |
| $(\text{ZnO})_3\text{C}_{90}$    | $S_8$         | 747.47         | 0.19 | 0.56    | 0.83  | -2.16   | LE                             | H-7->LUMO (16%), HOMO->L+2 (69%)                                                                                                                                       |
|                                  | $S_{12}$      | 671.20         | 0.15 | 1.16    | 0.60  | -2.65   | LE-CT                          | H-8->LUMO(17%),H-7->LUMO(54%),H-5->LUMO (13%)                                                                                                                          |
|                                  | $S_{30}$      | 466.26         | 0.12 | 0.52    | 0.77  | -3.64   | LE                             | H-4->L+1 (42%), H-3->L+1 (32%)                                                                                                                                         |
|                                  | $S_{35}$      | 450.57         | 0.10 | 0.39    | 0.81  | -4.71   | LE                             | H-4->L+2 (70%)                                                                                                                                                         |
|                                  | $S_{65}$      | 356.62         | 0.18 | 0.87    | 0.64  | -1.99   | LE                             | H-3->L+4 (19%), H-2->L+5 (59%)                                                                                                                                         |
| $(\text{ZnO})_4\text{C}_{88}$    | $S_8$         | 603.21         | 0.14 | 0.70    | 0.82  | -3.14   | LE                             | H-2->LUMO (26%), H-1->L+2 (14%), H-1->L+3 (44%)                                                                                                                        |
|                                  | $S_{15}$      | 492.31         | 0.10 | 1.84    | 0.62  | -0.31   | LE-CT                          | H-2->L+2 (38%), H-2->L+3 (16%), H-1->L+6 (20%), HOMO->L+4 (13%)                                                                                                        |
|                                  | $S_{20}$      | 464.44         | 0.10 | 0.82    | 0.73  | -2.86   | LE                             | H-2->L+3 (12%), H-1->L+6 (19%), H-1->L+7 (42%), HOMO->L+8 (10%)                                                                                                        |
|                                  | $S_{23}$      | 453.30         | 0.29 | 1.32    | 0.72  | -2.87   | LE-CT                          | H-5->LUMO (62%)                                                                                                                                                        |
|                                  | $S_{32}$      | 420.62         | 0.10 | 0.10    | 0.72  | -1.22   | LE                             | H-5->L+1 (57%), HOMO->L+8 (16%)                                                                                                                                        |
|                                  | $S_{43}$      | 386.54         | 0.18 | 0.84    | 0.63  | -3.67   | LE                             | H-5->L+2 (61%)                                                                                                                                                         |
|                                  | $S_{59}$      | 353.30         | 0.18 | 1.88    | 0.74  | -2.88   | LE-CT                          | H-7->L+2 (17%), H-4->L+4 (34%), H-3->L+5 (12%)                                                                                                                         |
|                                  | $S_{60}$      | 349.29         | 0.15 | 0.44    | 0.73  | -0.91   | LE                             | H-7->L+2 (13%), H-2->L+9 (15%), H-1->L+13 (31%)                                                                                                                        |
|                                  | $S_{65}$      | 343.38         | 0.15 | 1.97    | 0.66  | -2.57   | LE-CT                          | H-10->L+1 (46%), H-4->L+4 (12%), H-3->L+4 (13%)                                                                                                                        |
| $S_{81}$                         | 324.03        | 0.11           | 2.79 | 0.54    | -0.64 | LE-CT   | H-6->L+5 (14%), H-4->L+7 (36%) |                                                                                                                                                                        |
| $(\text{ZnO})_7\text{C}_{82}$    | $S_{24}$      | 464.04         | 0.23 | 4.57    | 0.61  | 0.37    | CT                             | H-9->LUMO (10%), H-3->L+2 (73%)                                                                                                                                        |
|                                  | $S_{30}$      | 437.17         | 0.10 | 2.63    | 0.59  | -0.90   | LE-CT                          | H-15->LUMO (28%), H-14->LUMO (20%), H-1->L+3 (10%), HOMO->L+6 (15%)                                                                                                    |
|                                  | $S_{31}$      | 435.36         | 0.12 | 0.83    | 0.62  | -2.60   | LE                             | H-1->L+3 (73%)                                                                                                                                                         |
|                                  | $S_{48}$      | 392.34         | 0.13 | 3.17    | 0.64  | -0.52   | LE-CT                          | H-2->L+4 (23%), H-2->L+6 (15%), H-1->L+8 (28%)                                                                                                                         |
|                                  | $S_{57}$      | 377.02         | 0.13 | 1.92    | 0.69  | -2.34   | LE-CT                          | H-4->L+4 (40%), HOMO->L+9 (11%)                                                                                                                                        |
|                                  | $S_{65}$      | 366.27         | 0.19 | 0.83    | 0.67  | -2.98   | LE                             | H-5->L+4 (30%), H-4->L+5 (15%)                                                                                                                                         |
|                                  | $S_{66}$      | 365.20         | 0.13 | 1.68    | 0.56  | -0.36   | LE-CT                          | H-5->L+3 (41%), H-4->L+6 (29%)                                                                                                                                         |
|                                  | $S_{88}$      | 338.03         | 0.11 | 0.53    | 0.69  | -3.32   | LE                             | H-10->L+1 (11%), H-8->L+2 (14%), H-5->L+7 (10%), H-3->L+9 (32%)                                                                                                        |
|                                  | $S_{93}$      | 334.17         | 0.12 | 0.45    | 0.64  | -3.04   | LE                             | H-5->L+7 (43%), H-2->L+10 (20%)                                                                                                                                        |
| $(\text{ZnO})_{12}\text{C}_{72}$ | $S_{32,33}$   | 414.94         | 0.12 | 2.56    | 0.42  | 0.52    | CT                             | H-10->LUMO (11%), H-8->LUMO (21%)<br>[H-11->LUMO (11%), H-9->LUMO (21%)]                                                                                               |
|                                  | $S_{61,62}$   | 362.51         | 0.20 | 1.94    | 0.66  | -1.91   | LE-CT                          | H-17->LUMO(15%), H-5->L+5 (23%), H-2->L+7 (38%)<br>[H-16->LUMO (15%),H-5->L+6(23%),H-3->L+7 (38%)]                                                                     |
|                                  | $S_{90,91}$   | 323.30         | 0.16 | 2.34    | 0.53  | -1.68   | LE-CT                          | H-6->L+1 (32%), HOMO->L+16 (23%)<br>[H-6->L+2 (32%), H-1->L+16 (23%)]                                                                                                  |
| $(\text{ZnO})_{27}\text{C}_{42}$ | $S_{19,20}$   | 535.45         | 0.10 | 1.52    | 0.79  | -3.86   | LE-CT                          | H-2->L+3 (68%) [H-2->L+4 (68%)]                                                                                                                                        |

**Table S11.** A comparison of the properties of dominant excited states (with oscillator strength  $f > 0.1$ ) in  $(\text{ZnO})_{27}\text{C}_{42}$  predicted by using different functionals: PBE0, B3LYP, CAM-B3LYP and wB97XD, respectively.

| System    | Excited state     | Wavelength, nm | Oscillator strength, $f$ | $D$ , Å | $S_r$ | $t$ , Å | Type  | Major contribution                                                                                                                     |
|-----------|-------------------|----------------|--------------------------|---------|-------|---------|-------|----------------------------------------------------------------------------------------------------------------------------------------|
| wB97XD    | $S_5, S_6$        | 435.32         | 2.48                     | 0.363   | 0.85  | -4.90   | LE    | H-2->L+4 (11%), H-1->L+4 (26%), HOMO->L+3 (26%) [H-2->L+3 (11%), H-1->L+3 (26%), HOMO->L+4 (26%)]                                      |
|           | $S_{91}, S_{92}$  | 243.13         | 0.31                     | 0.668   | 0.58  | -1.629  | LE-CT | H-27->LUMO (10%)<br>[H-28->LUMO (10%)]                                                                                                 |
|           | $S_{99}, S_{100}$ | 239.71         | 0.20                     | 1.350   | 0.55  | -0.794  | LE-CT | H-22->LUMO (14%)<br>[H-23->LUMO (14%)]                                                                                                 |
| B3LYP     | $S_{13}, S_{14}$  | 680.74         | 1.27                     | 0.639   | 0.89  | -4.97   | LE    | H-1->L+3 (25%), H-1->L+4 (22%), HOMO->L+3 (22%), HOMO->L+4 (25%)                                                                       |
|           | $S_{27}, S_{28}$  | 535.66         | 0.45                     | 0.95    | 0.85  | -3.96   | LE    | HOMO->L+8 (39%), HOMO->L+9 (23%)                                                                                                       |
|           | $S_{31}, S_{32}$  | 503.59         | 0.40                     | 1.27    | 0.86  | -3.84   | LE    | H-3->L+3 (39%), HOMO->L+8 (12%), HOMO->L+9 (28%)                                                                                       |
| CAM-B3LYP | $S_6, S_7$        | 453.52         | 1.73                     | 1.220   | 0.75  | -1.274  | LE-CT | H-1->L+1 (13%), H-1->L+3 (12%), HOMO->L+2 (13%), HOMO->L+4 (12%)<br>[H-1->L+2 (13%), H-1->L+4 (12%), HOMO->L+1 (13%), HOMO->L+3 (12%)] |
|           | $S_8, S_9$        | 446.87         | 0.72                     | 2.795   | 0.54  | 0.057   | CT    | H-1->L+1 (14%), H-1->L+3 (12%), HOMO->L+2 (14%), HOMO->L+4 (12%)<br>[H-1->L+2 (14%), H-1->L+4 (12%), HOMO->L+1 (14%), HOMO->L+3 (12%)] |
|           | $S_{66}, S_{67}$  | 277.94         | 0.25                     | 1.650   | 0.61  | -0.870  | LE-CT | H-12->LUMO (16%) [H-11->LUMO (16%)]                                                                                                    |
| PBE0      | $S_{10}, S_{11}$  | 635.52         | 1.55                     | 0.24    | 0.89  | -5.25   | LE    | H-1->L+4 (46%), HOMO->L+3 (46%)<br>[H-1->L+3 (46%), HOMO->L+4 (46%)]                                                                   |
|           | $S_{23}, S_{24}$  | 496.79         | 0.51                     | 1.06    | 0.88  | -4.41   | LE-CT | H-2->L+4 (15%), H-1->L+9 (11%), HOMO->L+8 (40%), HOMO->L+9 (19%)<br>[H-2->L+3 (15%), H-1->L+8 (40%), H-1->L+9 (19%), HOMO->L+9 (11%)]  |
|           | $S_{27}, S_{28}$  | 466.6          | 0.27                     | 1.33    | 0.86  | -3.63   | LE-CT | H-3->L+3 (19%), H-3->L+4 (10%), H-1->L+8 (12%), HOMO->L+9 (32%)<br>[H-3->L+3 (10%), H-3->L+4 (19%), H-1->L+9 (32%), HOMO->L+8 (12%)]   |

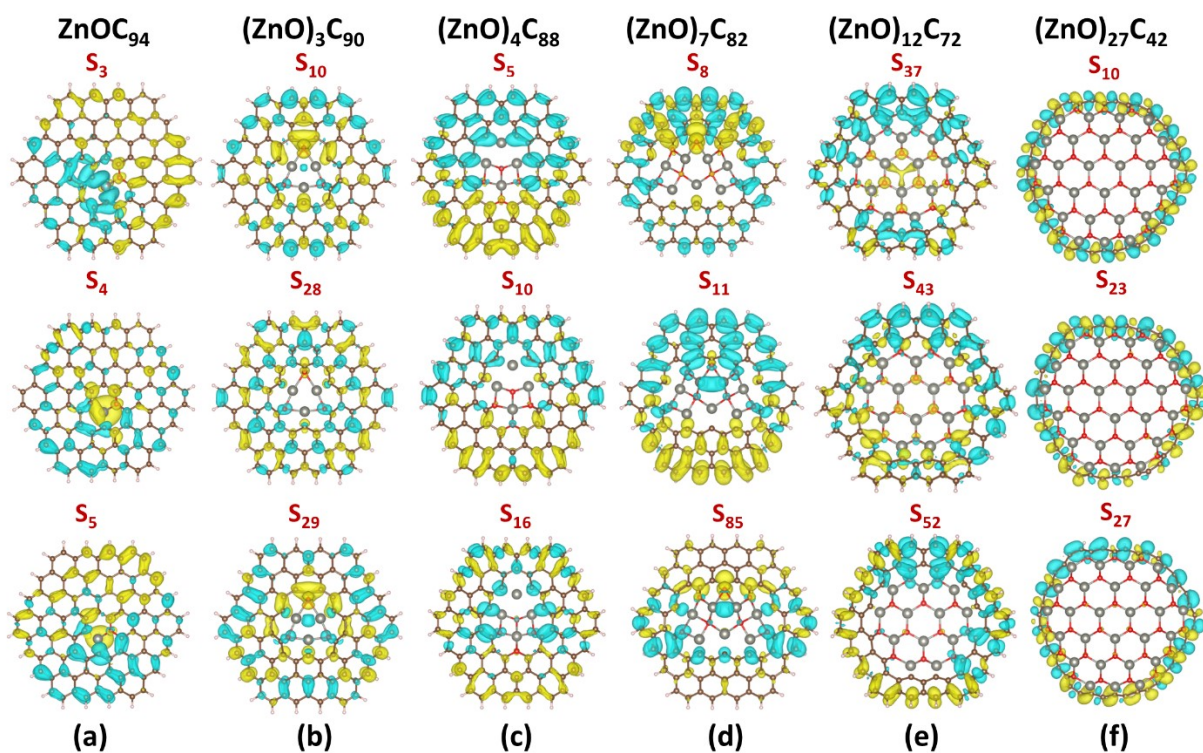

**Figure S24.** CDD for selected excited states (with the largest oscillator strength) in (a) ZnOC<sub>94</sub>, (b) (ZnO)<sub>3</sub>C<sub>90</sub>, (c) (ZnO)<sub>4</sub>C<sub>88</sub>, (d) (ZnO)<sub>7</sub>C<sub>82</sub>, (e) (ZnO)<sub>12</sub>C<sub>72</sub>, and (f) (ZnO)<sub>27</sub>C<sub>42</sub>, respectively. Herein, yellow denotes positive charge distribution and cyan means negative charge distribution. All calculations are performed using PBE0 functional.

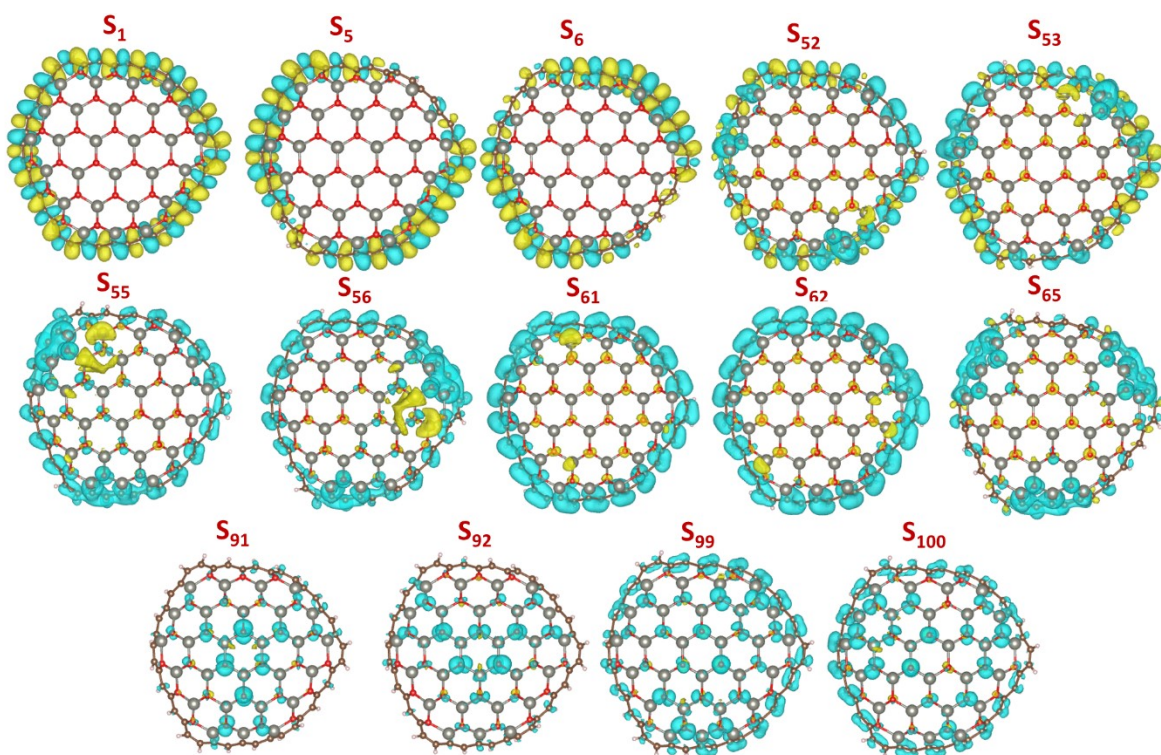

**Figure S25.** CDD for selected excited states (with the largest oscillator strength) in  $(\text{ZnO})_{27}\text{C}_{42}$ . Herein, yellow denotes positive charge distribution and cyan means negative charge distribution. Isosurface level is set to be 0.0003. All calculations are performed using wB97XD functional.

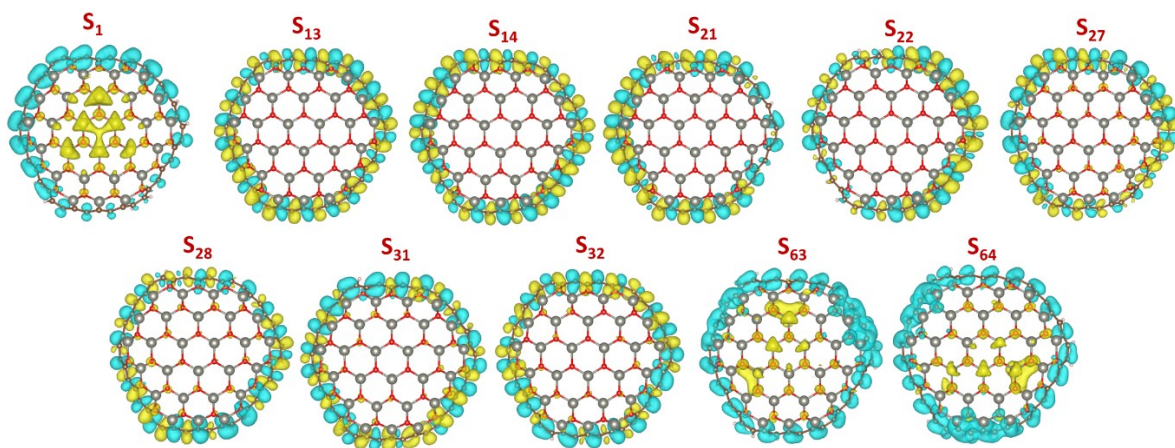

**Figure S26.** CDD for selected excited states (with the largest oscillator strength) in  $(\text{ZnO})_{27}\text{C}_{42}$ . Herein, yellow denotes positive charge distribution and cyan means negative charge distribution. Isosurface level is set to be 0.0003. All calculations are performed using B3LYP functional.



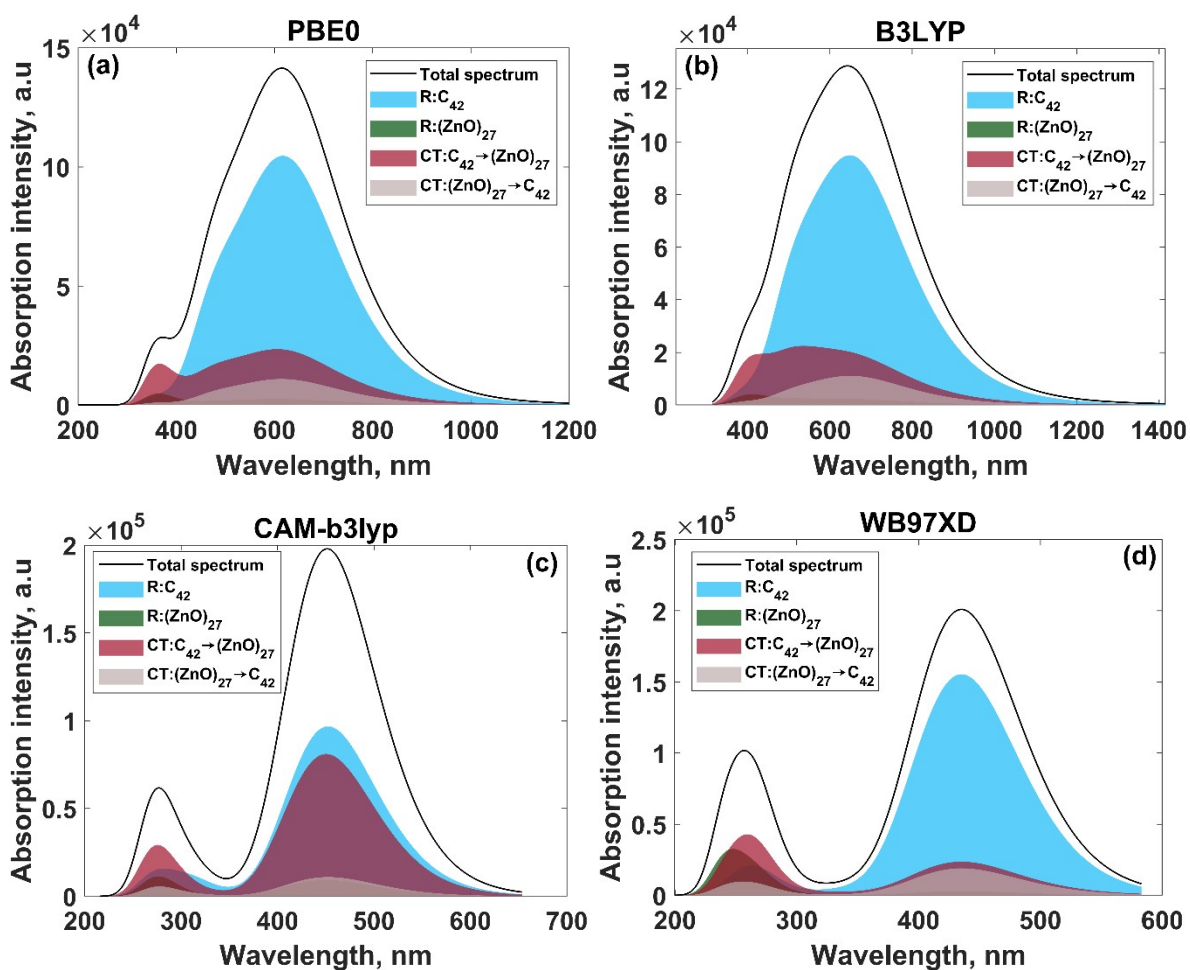

**Figure S27.** Charge-transfer spectra (CTS) of the  $(\text{ZnO})_{27}\text{C}_{42}$  predicted using different functionals: (a) PBE0, (b) B3LYP, (c) CAM-B3LYP, and (d) wB97XD, respectively. CTS spectra include intrafragment electron redistribution (R) and interfragment charge transfer (CT) components, respectively.
